# SN 2018zd: an unusual stellar explosion as part of the diverse Type II Supernova landscape

Jujia Zhang,<sup>1,2,3,4</sup>★ Xiaofeng Wang,<sup>5,6</sup> Vinkó József,<sup>7,8,9</sup> Qian Zhai,<sup>1,2,3,4</sup> Tianmeng Zhang,<sup>10,11</sup> Alexei V. Filippenko,<sup>12,13</sup> Thomas G. Brink,<sup>12</sup> WeiKang Zheng,<sup>12</sup> Łukasz Wyrzykowski,<sup>14</sup> Przemysław Mikołajczyk,<sup>14</sup> Fang Huang,<sup>15</sup> Liming Rui,<sup>5</sup> Jun Mo,<sup>5</sup> Hanna Sai,<sup>5</sup> Xinhan Zhang,<sup>5</sup> Huijuan Wang,<sup>10,11</sup> James M. DeKacy,<sup>16</sup> Eddie Baron<sup>16</sup>,<sup>16</sup> K. Sárneczky,<sup>7</sup> A. Bódi,<sup>7,17</sup> G. Csörnyei,<sup>7,8</sup> O. Hanyecz,<sup>7</sup> B. Ignác,<sup>7</sup> Cs. Kalup,<sup>7,8,17</sup> L. Kriskovics,<sup>7,8</sup> R. Könyves-Tóth,<sup>7,8</sup> A. Ordasi,<sup>7</sup> A. Pál,<sup>7,8,18</sup> Á. Sódor,<sup>7,17</sup> R. Szakáts,<sup>7</sup> K. Vida<sup>7,8,17</sup> and G. Zsidi<sup>7,8,19</sup>

*Affiliations are listed at the end of the paper*

Accepted 2020 July 26. Received 2020 July 23; in original form 2020 April 11

## ABSTRACT

We present extensive observations of SN 2018zd covering the first  $\sim 450$  d after the explosion. This SN shows a possible shock-breakout signal  $\sim 3.6$  h after the explosion in the unfiltered light curve, and prominent flash-ionization spectral features within the first week. The unusual photospheric temperature rise (rapidly from  $\sim 12\,000$  to above  $18\,000$  K) within the earliest few days suggests that the ejecta were continuously heated. Both the significant temperature rise and the flash spectral features can be explained by the interaction of the SN ejecta with the massive stellar wind ( $0.18_{-0.10}^{+0.05} M_{\odot}$ ), which accounts for the luminous peak ( $L_{\max} = [1.36 \pm 0.63] \times 10^{43}$  erg s $^{-1}$ ) of SN 2018zd. The luminous peak and low expansion velocity ( $v \approx 3300$  km s $^{-1}$ ) make SN 2018zd like a member of the LLEV (luminous SNe II with low expansion velocities) events originating due to circumstellar interaction. The relatively fast post-peak decline allows a classification of SN 2018zd as a transition event morphologically linking SNe IIP and SNe IIL. In the radioactive-decay phase, SN 2018zd experienced a significant flux drop and behaved more like a low-luminosity SN IIP both spectroscopically and photometrically. This contrast indicates that circumstellar interaction plays a vital role in modifying the observed light curves of SNe II. Comparing nebular-phase spectra with model predictions suggests that SN 2018zd arose from a star of  $\sim 12 M_{\odot}$ . Given the relatively small amount of  $^{56}\text{Ni}$  ( $0.013\text{--}0.035 M_{\odot}$ ), the massive stellar wind, and the faint X-ray radiation, the progenitor of SN 2018zd could be a massive asymptotic giant branch star that collapsed owing to electron capture.

**Key words:** supernovae: general – supernovae: individual: (SN 2018zd).

## 1 INTRODUCTION

Type II supernovae (SNe II) are hydrogen-rich core-collapse events that are observationally divided into Type IIP (SNe IIP), Type IIL (SNe IIL), Type IIn (SNe IIn), and Type IIb (SNe IIb) (for reviews, see e.g. Filippenko 1997; Gal-Yam 2017). Among them, SNe IIP belong to the most abundant subclass, which is characterized by a relatively constant optical luminosity plateau lasting for about three months ( $\sim 100$  d) after the explosion, followed by a rapid drop to the radioactive tail. The thermalization of the initial shock wave and the recombination of the ionized hydrogen provide sources to power the plateau light curve (Popov 1993). SNe IIL were named after their linear (in magnitude) light-curve decay that starts soon after peak brightness. Based on the understanding of SNe IIP, the absence of a plateau in the light curves of SNe IIL might suggest lower energy input at a similar phase, while the absence of an abrupt drop in

brightness after a few months might indicate a lower-mass H envelope in their progenitors. However, the higher peak luminosity of SNe IIL ( $\sim 1.5$  mag brighter than that of SNe IIP, on average; Patat et al. 1993, 1994; Li et al. 2011; Anderson et al. 2014; Faran et al. 2014; Sanders et al. 2015) disfavors this hypothesis. The continuous range of early-time light-curve slopes found among SNe II (e.g. Anderson et al. 2014; Sanders et al. 2015) and the observed transitional events (e.g. SN 2013ej, Huang et al. 2015; SN 2013by, Valenti et al. 2015) tend to suggest a continuous progenitor population for SNe IIP and SNe IIL.

A fraction of SNe II exhibit signatures of ejecta interaction with circumstellar material (CSM) produced by mass loss in massive stars, especially at their late phases before core collapse. The events that present prominent interaction signatures are classified as SNe IIn (Schlegel 1990). The observed diversity of SNe IIn indicates that the circumstellar environments around their progenitors are complicated. The duration of interaction has large scatter, spanning from a few days (e.g. SN 2013fs, Yaron et al. 2017), a few weeks (e.g. SN 1998S, Fassia et al. 2000; Leonard et al. 2000), a few months (e.g. SN 2010jl,

★ E-mail: [jujia@ynao.ac.cn](mailto:jujia@ynao.ac.cn)

Zhang et al. 2012; Fransson et al. 2014) to even a few years (e.g. SN 2015da, Tartaglia et al. 2020).

The spectra of SNe I Ib are similar to those of the SNe IIP and IIL (with strong lines of H) near maximum light, but in the following weeks they usually metamorphose into SNe Ib (Filippenko 1988; Filippenko, Matheson & Ho 1993). We do not discuss SNe I Ib in this paper because they show more similarities to hydrogen-poor events (SNe Ibc, Arcavi et al. 2012; Stritzinger et al. 2018).

The physical origin of SNe IIP and IIL, and their connections with SNe IIn regarding the physical characteristics of their progenitor scenarios and explosion properties, have been long-standing issues. There are pieces of evidence indicating that the diversity between SNe IIP and IIL can be partly explained with short-lived interaction (Valenti et al. 2015; Morozova, Piro & Valenti 2017). We present optical and ultraviolet (UV) data for the core-collapse SN 2018zd, obtained through an observational campaign that lasted for about 450 d with several telescopes. This SN shows a series of interaction signatures in both spectra and light curves, as well as a large flux drop before entering the radioactive-decay phase.

Observations and data reduction are described in Section 2. The UV and optical light curves are presented in Section 3, while the spectral evolution is shown in Section 4. In Section 5, we discuss the bolometric light curve, explosion parameters, progenitor properties, velocity evolution, the position of this SN in the SNe II family, and the possibility of originating from the electron-capture channel. A brief conclusion is given in Section 6.

## 2 OBSERVATIONS

Koichi Itagaki reported the discovery of the transient AT 2018zd in the nearby SB(s)ab galaxy NGC 2146 on 2018 March 2.49 (UT dates are used throughout this paper). This transient was discovered at 17.8 mag in an unfiltered image obtained with a 0.5 m reflector at the Takamizawa station of Japan.<sup>1</sup> Its J2000 coordinates are RA 6<sup>h</sup>18<sup>m</sup>03<sup>s</sup>.18 and Dec. 78°22′00″.90, which is 104′.5 west and 35′.6 north of the centre of the host galaxy.

The earliest spectroscopic observations of AT 2018zd were initiated at Li-Jiang Observatory of Yunnan Observatories (YNAO) with the Li-Jiang 2.4 m telescope (hereafter LJT; Fan et al. 2015) equipped with the YFOSC (Yunnan Faint Object Spectrograph and Camera; Wang et al. 2019) only 3 h after the discovery. However, the noisy spectrum precluded prompt classification of this transient. SN 2018zd was later classified as a young Type IIn SN from a relatively high-quality spectrum obtained at LJT on 2018 March 5.74, which showed narrow emission lines superimposed on a blue continuum (Zhang, Yu & Wang 2018).

Given the close distance and the young phase when the SN was discovered, we triggered a follow-up observational campaign of SN 2018zd with the LJT of YNAO, the Xing-Long 2.16 m telescope (hereafter XLT), the Tsinghua-NAOC (National Astronomical Observatories of China) 0.8 m telescope (hereafter TNT; Wang et al. 2008; Huang et al. 2012) at Xing-Long Observatory of the NAOC, the 0.6/0.9 m Schmidt telescope (hereafter KOT) of the Konkoly Observatory of the Hungarian Academy of Sciences, and the 0.6 m Cassegrain reflector telescope (hereafter WT) at the Astronomical Observatory of the University of Wrocław, Bialkow, Poland (Mikolajczyk & Wyrzykowski 2018). The monitoring spanned  $t \approx 2$  to  $t \approx 456$  d (where  $t$  denotes time after the explosion). Late-time spectra were also collected with the 3.5 m Astrophysical

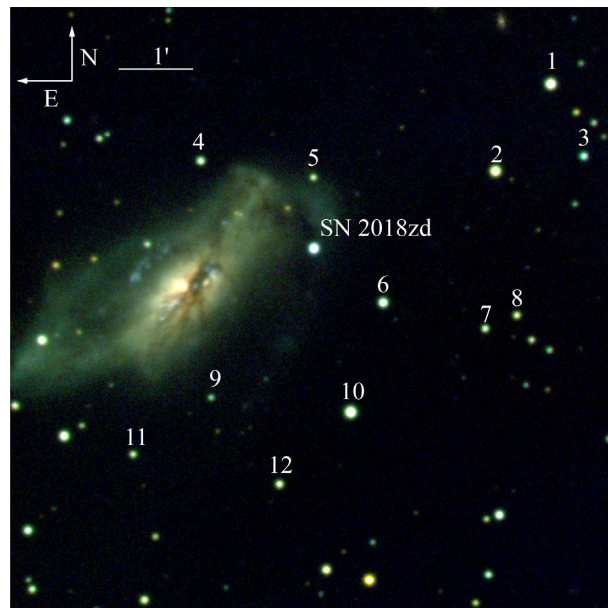

**Figure 1.** Finder chart of SN 2018zd in NGC 2146. The local reference stars listed in Table A1 are marked with a nearby number. This chart was combined by the *UBV*-band images taken with the 2.4 m LJT and YFOSC on 2018 March 7, with a pixel size of  $0''.57$  in the Bin2 readout mode. The average FWHM is  $2''.20$  because of the high airmass ( $\sim 1.90$ ) during the observation.

Research Consortium (hereafter ARC) telescope of the Apache Point Observatory (APO), and the Keck-I 10 m telescope on Maunakea, Hawai'i. Moreover, the UV–optical photometry spanning  $t \approx 3$  to  $t \approx +116$  d obtained with UVOT on the Neil Gehrels *Swift* Observatory (Gehrels et al. 2004; Roming et al. 2005) is also included here.

### 2.1 Photometry

SN 2018zd was densely observed by the LJT in the Johnson *UBV* bands and the Sloan *gri* bands, by the TNT and KOT in Johnson *BV* and Cousins *RI*, and by the WT in Johnson *BV* and Sloan *ri*. These images were reduced using IRAF<sup>2</sup> standard procedures, including corrections for bias, overscan, flat-field, and removal of cosmic rays. The point-spread-function fitting method (Stetson 1987) was used to measure the instrumental magnitudes of the SN. We selected 12 local reference stars in the field of SN 2018zd, as marked in Fig. 1. The instrumental magnitudes of these reference stars are converted to standard *UBVRI* (Vega magnitudes) and *gri* (AB magnitudes) through transformations established by observing a series of Landolt (1992) and Smith et al. (2002) standard stars on some photometric nights, respectively. These magnitudes are applied to calibrate the photometry of SN 2018zd, as presented in Table A2. The photometry of WT is calibrated via the Cambridge Photometric Calibration Server.<sup>3</sup>

Photometry of SN 2018zd was obtained by the *Swift*/UVOT in three UV filters (*uvw2*, *uvm2*, and *uvw1*) and three broad-band optical filters (*u*, *b*, and *v*) and is presented in Table A3. These *Swift* images

<sup>2</sup>IRAF, the Image Reduction and Analysis Facility, is distributed by the National Optical Astronomy Observatory, which is operated by the Association of Universities for Research in Astronomy (AURA), Inc. under cooperative agreement with the National Science Foundation (NSF).

<sup>3</sup><http://gsaweb.ast.cam.ac.uk/followup>

<sup>1</sup><http://www.k-itagaki.jp>

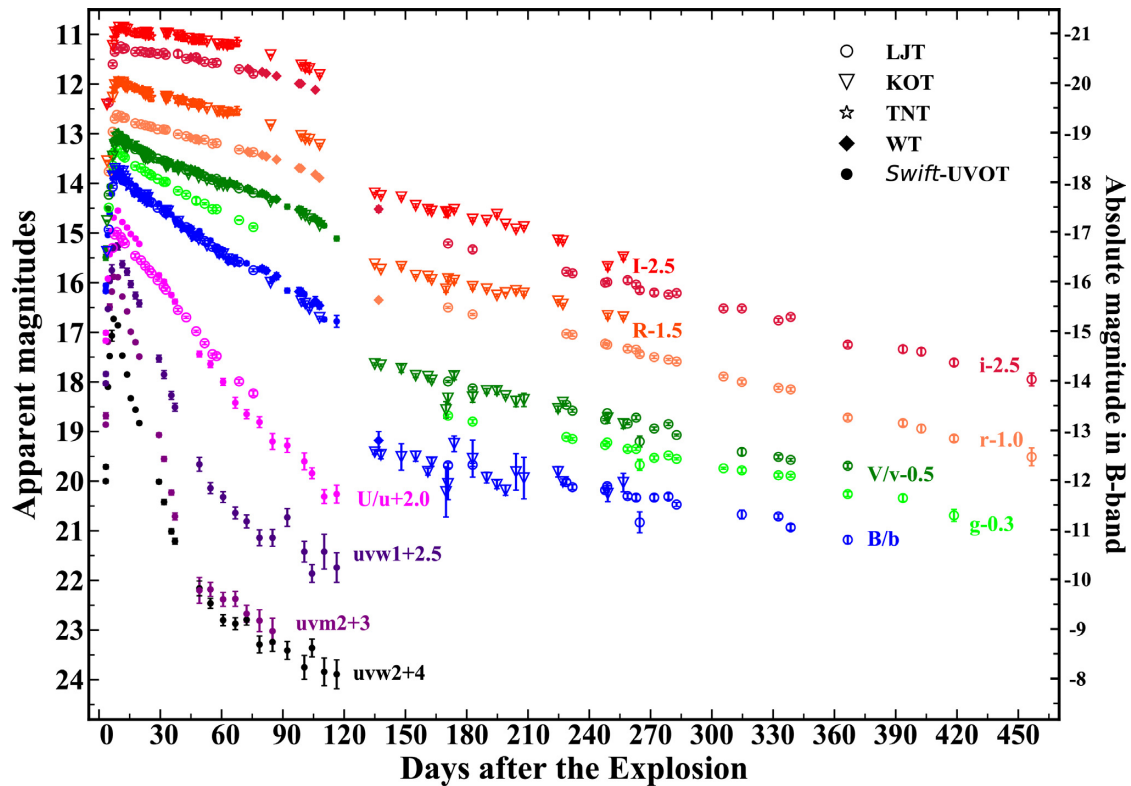

**Figure 2.** UV-optical light curves of SN 2018zd obtained with the 2.4 m LJT, the 0.8 m KOT, the 0.8 m TNT, the 0.6 m WT, and the *Swift*/UVOT. All measurements are shifted vertically for better visibility.

were reduced using the HEASOFT<sup>4</sup> with the latest *Swift* calibration database.<sup>5</sup>

All of the photometry is presented in Fig. 2, which covers the first  $\sim 450$  d since discovery. Note that the instrumental response curves of the UVOT optical filters do not follow exactly those of the Johnson *UBV* system, especially in *Swift* *u* where the UVOT coverage is wider than Johnson *U*. Thus, we treat the *u* and *U* bands individually in the following calculation and analysis.

## 2.2 Spectroscopy

Fig. 3 shows the spectral sequence of SN 2018zd spanning  $t \approx +2$  to  $t \approx +400$  d. The journal of observations is given in Table A4, including 22 spectra from LJT (with the YFOSC), 12 from XLT (with the Beijing Faint Object Spectrograph and Camera, BFOC), two from ARC (with the Dual Imaging Spectrograph, DIS), and one from Keck-I (with the Low-Resolution Imaging Spectrometer, LRIS; Oke et al. 1995). All of these spectra are calibrated in both wavelength and flux, and they are corrected for telluric absorption and redshift. Spectra were obtained with a slit oriented along the parallactic angle to minimize the effects of atmospheric dispersion (Filippenko 1982); moreover, the continuum shape was further corrected with multi-band photometry. One spectrum (presented at the transient name system, TNS<sup>6</sup>), obtained

using the FLOYDS spectrograph on the Las Cumbres Observatory 2 m Faulkes Telescope North (FTN) on Haleakala, Hawaii, is also plotted in this figure to help elucidate the rapid evolution at very early times.

## 2.3 Distance and extinction

The distance  $D$  of SN 2018zd adopted in the following calculation is  $18.4 \pm 4.5$  Mpc, derived from the averaged measurements of the host galaxy (NGC 2146) listed in the NASA/IPAC Extragalactic Database (NED<sup>7</sup>). For example, the average estimation from the Tully–Fisher relation is  $D = 19.2 \pm 8.8$  Mpc (Bottinelli et al. 1984; Giraud 1985; Tully & Fisher 1988; Schoniger & Sofue 1994; Tutui & Sofue 1997), the measurement via the observed angular radius of typical globular clusters in NGC 2146 (compared with the physical radii of Milky Way globulars) is  $18.0 \pm 1.8$  Mpc (Adamo et al. 2012), and the result from the radial velocity of NGC 2146 ( $v = 1219 \pm 16$  km s<sup>-1</sup>, after correcting for Local Group infall into the Virgo Cluster, the Great Attractor, and the Shapley Supercluster Mould et al. 2000) is  $17.98 \pm 1.26$  Mpc with  $H_0 = 67.8$  km s<sup>-1</sup> Mpc<sup>-1</sup> (Planck Collaboration I 2014).

In our analysis, we use the interstellar Na I D absorption to estimate the reddening towards SN 2018zd. Two Na I D absorption systems are detected in the spectra of SN 2018zd, with similar equivalent widths (EW),  $\sim 1.3 \pm 0.1$  Å (see Fig. 8), suggesting significant extinction due to the host galaxy and the Milky Way. The minimum reddening value derived from the existing empirical correlations between reddening

<sup>4</sup>HEASOFT, the High Energy Astrophysics Software <http://www.swift.ac.uk/analysis/software.php>.

<sup>5</sup><http://heasarc.gsfc.nasa.gov/docs/heasarc/caldb/swift/>

<sup>6</sup><https://wis-tns.weizmann.ac.il/object/2018zd>

<sup>7</sup><http://ned.ipac.caltech.edu>

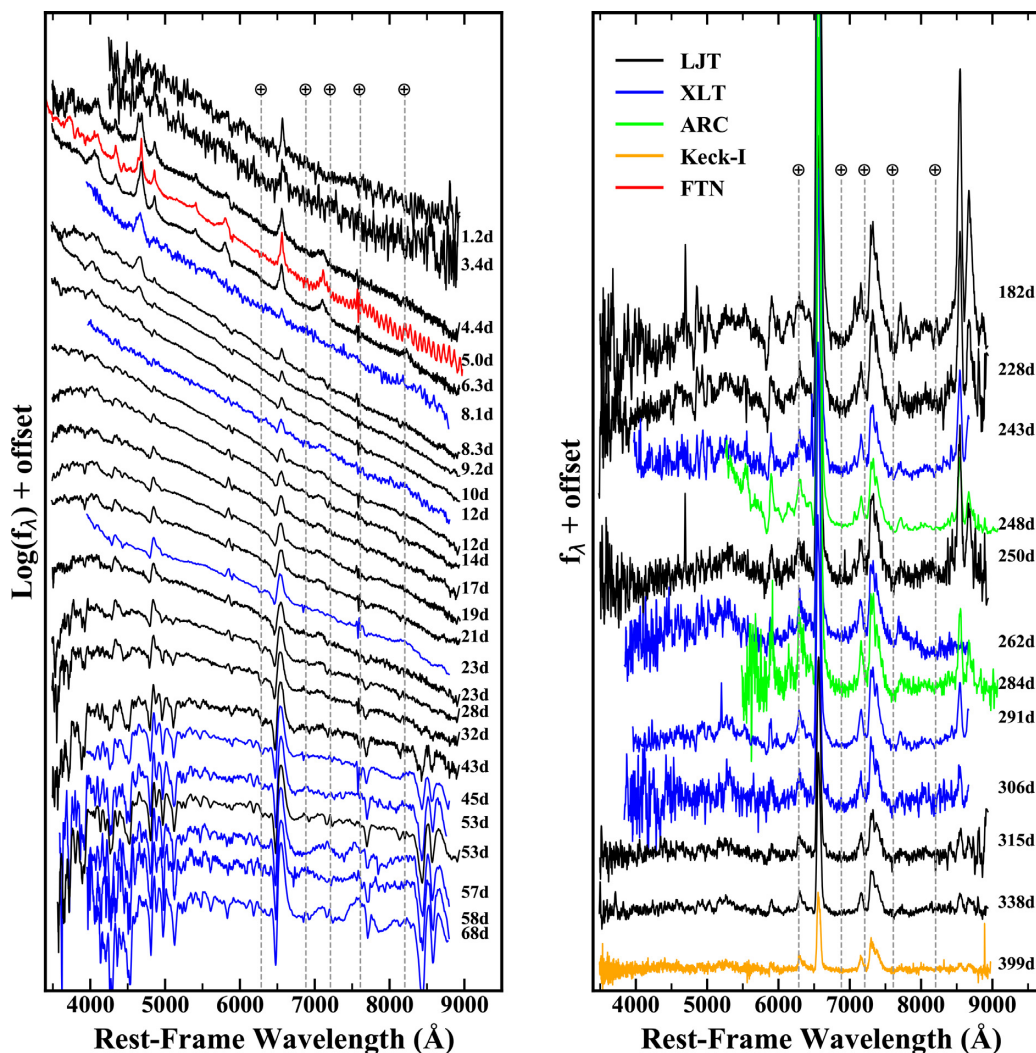

**Figure 3.** Spectra of SN 2018zd obtained with LJT (black), XLT (blue), ARC (green), Keck-I (orange), and FTN (cyan), shifted vertically for clarity. Regions where telluric absorption was removed (sometimes leaving residuals) are marked with an Earth symbol. Various bin sizes were used for the different spectra, depending on the original signal-to-noise ratio. Left: early-phase and photospheric-phase spectra. Right: nebular-phase spectra.

and EW of Na I D,  $E(B - V) = 0.16 \text{ EW} - 0.01 \text{ mag}$  (Turatto et al. 2003), is  $E(B - V)_{\text{host}} = E(B - V)_{\text{MW}} = 0.198 \text{ mag}$ . However, the Galactic reddening derived by Schlafly & Finkbeiner (2011) is only  $E(B - V)_{\text{MW}} = 0.085 \text{ mag}$ . Considering the large scatter of the reddening measurement via Na I D absorption (e.g. Poznanski et al. 2011), we assume  $E(B - V)_{\text{host}} = E(B - V)_{\text{MW}}$  because of the similar EW of Na I D from the host galaxy and the Milky Way. Thus, a total reddening of  $E(B - V) = 0.17 \pm 0.05 \text{ mag}$  with the extinction law  $R_V = 3.1$  is adopted in this paper. This matches the estimate via the  $V - I$  colour in Section 3.4. We caution, however, that the luminosity of SN 2018zd may be underestimated because of the conservative host-galaxy reddening adopted in our analysis.

### 3 ANALYSIS OF THE PHOTOMETRY

#### 3.1 Explosion date and a shock-breakout signal

To better estimate the explosion date of SN 2018zd, we also collect the clear-band data obtained by amateur astronomers in the

early phase of detections,<sup>8</sup> as listed in Table A5. The clear-band photometry roughly matches that of the  $r$  band of LJT, as shown in Fig. 4.

A simple expanding fireball model,  $F(t) = F_1 \times (t - t_0)^2$ , is applied to fit observations at  $t \lesssim 8 \text{ d}$  except for the earliest detection. The explosion date derived by the expanding fireball model is  $\text{MJD} = 58178.39^{+0.15}_{-0.50}$ , which implies that SN 2018zd was first detected (by Itagaki; see below) only 3.6 h after the explosion. It is reasonable that SN 2018zd was very young at the first detection because its brightness increased by  $\sim 5 \text{ mag}$  when approaching the peak.

Note that Itagaki had a prediscovery detection (obtained with a 0.35 m telescope at Okayama Observatory) at the site of SN 2018zd roughly one day before his official discovery image, with an unfiltered magnitude of 18.0. About 13 h after this earliest detection, however, Patrick Wiggins<sup>9</sup> reported a non-detection of SN 2018zd in an unfiltered image with an upper limit of 18.5 mag. Such an intraday

<sup>8</sup>Bright Supernovae, [www.rochesterastronomy.org/sn2018/sn2018zd.html](http://www.rochesterastronomy.org/sn2018/sn2018zd.html).

<sup>9</sup><https://wis-tns.weizmann.ac.il/object/2018zd#comment-wrapper-1927>

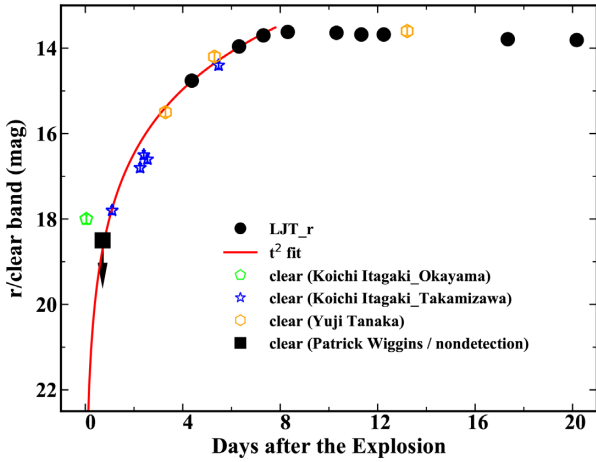

**Figure 4.** Expanding fireball fit of the early detections of SN 2018zd in the clear band and the  $r$  band, where the first detection by Itagaki cannot be fitted.

dip is very likely related to the shock-breakout phenomenon (as seen in KSN 2011d; Garnavich et al. 2016).

### 3.2 Photometric results

Table 1 lists estimates of the explosion time to peak brightness ( $t_{\text{rise}}$ ), the apparent ( $m_{\text{max}}$ ) and absolute ( $M_{\text{max}}$ ) magnitude at maximum brightness, the absolute magnitude at the end of the plateau phase ( $M_{\text{end}}$ , at  $t = 125$  d, in the case of SN 2018zd) and at the beginning of the radiative tail ( $M_{\text{tail}}$ , at  $t = 155$  d), the decline rate from peak to 50 d later ( $\Delta m_{50}$ ), and the decline rate per 100 d ( $\gamma$ ) during the radioactive tail (at  $t > 150$  d, when the light curve is powered by radioactive decay and is governed by  $\gamma$ -ray trapping) of SN 2018zd in all bands presented in Fig. 2.

Compared with the sample from Pritchard et al. (2014), the absolute peak magnitudes of SN 2018zd are located at the luminous end of SNe IIP and SNe IIL, and the faint end of SNe IIn. The UV peak of SN 2018zd ( $M_{\text{UV}} \approx -20$  mag) is brighter than that of SNe IIP ( $M_{\text{UV}} \approx -18$  mag), and is close to the average brightness of SNe IIn ( $M_{\text{UV}} \approx -20$  mag). The optical brightness of SN 2018zd (e.g.  $M_{\text{Op}} \approx -18$  mag, in the  $B$  and  $V$  bands) lies between the bright end of SNe IIP ( $-18 < M_{\text{Op}} < -15$  mag) and the faint end of SNe IIn ( $-20 < M_{\text{Op}} < -18$  mag; Pritchard et al. 2014). Richardson et al. (2002) found that the average  $B$ -band peak absolute magnitude is  $M_B = -17.0 \pm 1.1$  mag for 29 SNe IIP and  $M_B = -18.0 \pm 0.9$  mag for 19 SNe IIL. This indicates that SN 2018zd is brighter than most SNe IIP and comparable to SNe IIL in the optical. Furthermore, considering SNe IIP and IIL as a continuous family, SN 2018zd is at the bright end of the distribution ( $-13.77 < M_V < -18.29$  mag; Anderson et al. 2014).

As shown in Fig. 2, the light curve of SN 2018zd had a fast decline from the peak to the plateau phase. Faran et al. (2014) suggested that SNe II with  $\Delta m_{50} > 0.5$  mag in the  $V$  band can be classified as SNe IIL. Based on such a criterion, SN 2018zd could be placed into the SN IIL group because of a relatively quick decline (i.e.  $\Delta m_{50}^V = 0.93 \pm 0.03$  mag). However, a further significant flux drop can be found at  $t \approx 115$  d in the optical light curves, with a decline of  $\sim 3$  mag when entering the radioactive-decay tail. Such a significant flux drop has been regarded as a typical feature of SNe IIP when the hydrogen recombination process ends in the envelope.

Nevertheless, Anderson et al. (2014) and Valenti et al. (2015) proposed that if all SNe IIL were monitored for a sufficiently long time, they would exhibit a significant drop in their late-time light curves. SN 2018zd is an excellent example supporting the above argument because of the SN IIL-like initial decline rate and the SN IIP-like drop from the end of plateau to the radioactive tail.

We notice that the UV light curves of SN 2018zd showed an unusually slow increase to peak compared to the optical, reaching maximum brightness  $\sim 1$  week after explosion. However, SNe II usually reach their UV maximum much earlier (at  $t \approx 1$ –3 d) than in the optical ( $\sim 5$  d in  $U$  and  $\sim 10$  d in  $I$ ). For example, Pritchard et al. (2014) noted that most of their sample were observed before the  $V$ -band maximum, but only a few before the UV maximum even though some were monitored at quite young phases.

### 3.3 Morphology of the light curves

The multi-band light curves of SN 2018zd are shown in Fig. 5, together with those of some well observed SNe II. The morphology comparison confirms the results derived in Section 3.2:

(1) The UV emission of SN 2018zd rises slowly; it reaches the  $uvw2$ -band peak  $\sim 3$ –6 d later than the other comparison SNe. The rise time of these SNe in the UV band is uncertain because their peaks occur near the time of the first detection. Thus, these events may have reached their maximum brightness a few days earlier than shown in this figure.

(2) The peak brightness of SN 2018zd is close to that of SNe IIP at the bright end, and it is close to that of SNe IIL and SNe IIn. Among the comparison SNe II, only SN IIn 1998S shows a more luminous peak than SN 2018zd.

(3) SN 2018zd has an intermediate decline rate during the plateau phase, faster than that of regular SNe IIP (e.g. SN 1999em, SN 2004et, and SN 2017eaw), but slower than that of fast-declining SNe II (e.g. SN 2013ej and SN 2013by).

(4) SN 2018zd exhibits the most significant drop from the peak to the end of the plateau phase, even greater than that of SN 2013ej and SN 2013by.

### 3.4 Colour curves

SN 2018zd shows bluer  $uvw2 - u$  and  $B - V$  colours at  $t \lesssim 50$  d than normal SNe IIP, as presented in Fig. 6, which might result from the contribution of CSM interaction. Based on a similar argument, it is not surprising that the colour of SN 1998S is bluer than that of SN 2018zd because the former might have stronger interaction.

Different comparison samples of SNe II generally exhibit similar colour evolution but with some notable differences. The most obvious is that SN 2018zd shows a very clear reversal (‘U-turn’) in the  $uvw2 - u$  colour curve at early times. A similar but weaker feature is present in the  $B - V$  and  $V - I$  colour curves. This U-turn behaviour indicates that the temperature increase of SN 2018zd is consistent with the temperature evolution derived in the following section. In addition, the decreased extinction due to dust destruction at the early phase of the explosion could also explain this U-turn behaviour. However, no evidence of dust destruction (e.g. the variation of Na I D absorption from the host galaxy) is found in our low-resolution spectra.

The  $uvw2 - u$  colour U-turn is not typical of the SN II family even among those with very early-time observations, such as SN 2017eaw and SN 2016X. It is suspected that SN 2013ej, SN 2013by, and SN 2016bkv might also have similar  $uvw2 - u$  colour evolution,

**Table 1.** Photometric results for SN 2018zd.<sup>a</sup>

| Band        | $\lambda_{\text{eff}}$ | FWHM (Å) | $t_{\text{rise}}$ (d) | $m_{\text{max}}^b$ (mag) | $M_{\text{max}}$ (mag) | $M_{\text{end}}$ (mag) | $M_{\text{tail}}$ (mag) | $\Delta m_{50}$ (mag) | $\gamma$ (mag [100 d] <sup>-1</sup> ) |
|-------------|------------------------|----------|-----------------------|--------------------------|------------------------|------------------------|-------------------------|-----------------------|---------------------------------------|
| <i>uvw2</i> | 1928                   | 657      | 6.94(0.05)            | 12.71(0.03)              | -19.97(0.61)           | -                      | -                       | 5.94(0.05)            | -                                     |
| <i>uvm2</i> | 2246                   | 498      | 7.27(0.06)            | 12.83(0.05)              | -20.06(0.67)           | -                      | -                       | 6.46(0.05)            | -                                     |
| <i>uvw1</i> | 2600                   | 693      | 7.35(0.05)            | 12.81(0.03)              | -19.61(0.54)           | -                      | -                       | 4.93(0.04)            | -                                     |
| <i>u</i>    | 3465                   | 785      | 8.27(0.05)            | 12.58(0.02)              | -19.54(0.45)           | -                      | -                       | 3.30(0.03)            | -                                     |
| <i>U</i>    | 3652                   | 485      | 8.46(0.05)            | 12.97(0.02)              | -19.14(0.44)           | -                      | -                       | 2.59(0.03)            | -                                     |
| <i>B</i>    | 4312                   | 831      | 9.13(0.05)            | 13.79(0.01)              | -18.19(0.41)           | -15.93(0.43)           | -12.48(0.43)            | 1.53(0.03)            | 0.74(0.06)                            |
| <i>g</i>    | 4754                   | 1280     | 8.77(0.05)            | 13.62(0.01)              | -18.29(0.39)           | -                      | -13.02(0.45)            | 1.24(0.03)            | 0.75(0.07)                            |
| <i>V</i>    | 5341                   | 827      | 8.98(0.05)            | 13.55(0.01)              | -18.26(0.36)           | -16.82(0.38)           | -13.43(0.38)            | 0.93(0.03)            | 0.90(0.07)                            |
| <i>r</i>    | 6196                   | 1150     | 9.21(0.05)            | 13.59(0.01)              | -18.15(0.34)           | -17.14(0.36)           | -14.49(0.38)            | 0.63(0.03)            | 1.09(0.06)                            |
| <i>R</i>    | 6315                   | 1742     | 9.28(0.07)            | 13.45(0.01)              | -18.28(0.33)           | -17.31(0.36)           | -14.37(0.36)            | 0.60(0.02)            | 0.80(0.06)                            |
| <i>i</i>    | 7690                   | 1230     | 9.67(0.05)            | 13.74(0.01)              | -17.88(0.30)           | -17.22(0.32)           | -14.06(0.35)            | 0.37(0.02)            | 0.96(0.06)                            |
| <i>I</i>    | 8752                   | 1970     | 10.18(0.08)           | 13.36(0.01)              | -18.19(0.28)           | -17.50(0.31)           | -14.66(0.33)            | 0.35(0.02)            | 1.12(0.09)                            |

Note. <sup>a</sup>The *uvw2*, *uvm2*, *uvw1*, and *u* bands of *Swift*/UOVOT, and the Johnson *UBVRI* bands, are in the Vega magnitude system. SDSS *gri* bands are in the AB magnitude system. The numbers given in brackets are the  $1\sigma$  uncertainties. <sup>b</sup>Derived by fitting a cubic polynomial to the points around maximum brightness.

as they show the *U*-turn feature in the *B* – *V* colour curve; however, their UV data are either absent or too poorly sampled for a detailed comparison.

The *uvw2* – *u* colour of SN 2018zd becomes bluer again at  $t > 40$  d, a reverse ‘U-turn’ shape that is due to the increased H Balmer absorption within the *u* band and the decreased metal line-blanking in the *uvw2* band (e.g. see the UV–optical spectral evolution in fig. 2 of Dessart et al. 2013). The similar reverse ‘U-turn’ seen in the *B* – *V* and *V* – *I* colours at  $t \gtrsim 150$  d is related to the evolution of emission lines in the nebular phase. These reverse ‘U-turn’ shapes seen in the colour curves do not imply that the temperature is rising.

The intrinsic colour of SNe II could be another way to estimate extinction. For example, Hamuy (2003) suggested using the *V* – *I* colour as a better reddening indicator than the *B* – *V* colour because it is expected to be less sensitive to metallicity effects. The *V* – *I* colour of SN 2018zd roughly follows that of SN 1999em, SN 2013ej, SN 2016X, and SN 2017eaw at  $10 < t < 100$  d. This suggests a smaller effect of interaction in the *V* – *I* colour of SN 2018zd than in the bluer colour. Thus, we could estimate the extinction via an empirical relation, such as  $A_V(V - I) = \beta_V[(V - I) - 0.656]$  (Olivares et al. 2010), where the *V* – *I* colour corresponds to the colour of a given SN 30 d before the end of the plateau, and  $\beta_V = A_V/E(V - I)$  is related to  $R_V$  (e.g.  $\beta_V = 2.518$  for  $R_V = 3.1$ ). Based on the *V* – *I* colour of SN 2018zd measured at the appropriate phase ( $t \approx 65$  d), the total extinction is estimated to be  $A_V^{\text{total}} = 0.52 \pm 0.10$  mag, and  $E(B - V)_{\text{total}} = 0.168 \pm 0.033$  for  $R_V = 3.1$ . These values are consistent with the reddening adopted in this paper.

### 3.5 Spectral energy distribution

The left-hand panel of Fig. 7 displays the spectral energy distribution (SED) of SN 2018zd at some selected epochs. At  $t \lesssim 116$  d, when *Swift*/UVOT observations are available, we construct the SED from the observed fluxes in the UV through optical passbands (covering the wavelength from  $\sim 1600$  to  $\sim 9700$  Å) obtained at the same phase. The missing data are obtained through interpolation of the adjacent data. The SEDs at  $t > 155$  d are constructed only from the *BVRI* or *BgVri* photometry.

The SED peaks towards shorter wavelengths in the first few days and then towards longer wavelengths, which conforms to an initial heating followed by cooling processes as indicated in the temperature curve presented in the right-hand panel of Fig. 7. The temperature of SN 2018zd is derived via blackbody fitting of the SED; it increases

from  $\sim 12\,000$  to  $\sim 18\,000$  K in the first week after the explosion. This behaviour might be related to CSM interaction at early times, as is also indicated by the early spectra (see Fig. 8). At these phases, the forward shock accelerates and heats the shocked wind/CSM and the reverse shock reheats the outer layers of the ejecta (Branch & Wheeler 2017).

For SNe II, it is not common to see a temperature increase at early times. Hosseinzadeh et al. (2018) reported an unexpected temperature rise of SN 2016bvk during a similar period. However, their conclusion is uncertain, owing to a lack of near-UV photometry. Thus, SN 2018zd could be the first SN II for which there is conclusive evidence of a rising temperature at early phases.

The right-hand panel of Fig. 7 also displays the photospheric radius ( $R$ ) of SN 2018zd calculated from the relation  $L = 4\pi\sigma R^2 T^4$ , where the luminosity  $L$  is derived by integrating the SED from 1600 to 27 000 Å; flux outside the wavelength range of photometric coverage is extrapolated based on a blackbody spectrum.

The photospheric radius of SN 2018zd is  $R = (3.57 \pm 0.50) \times 10^3 R_\odot$  at  $t \approx 2.9$  d, increasing slowly during the temperature rising phase. After  $\sim 40$  d of faster expansion, SN 2018zd reached maximum photospheric radius ( $R \approx 2.5 \times 10^4 R_\odot$ ) at  $t \approx 45$  d and remained almost unchanged during the next two months; thus, recombination provided the dominant source of energy at this phase. The recombination temperature is  $\sim 6000$  K, so the ejecta consist of a mixture of hydrogen and helium (Grassberg & Nadyozhin 1976). The photospheric radius decreases when recombination ends and the SN envelope becomes transparent.

## 4 SPECTROSCOPIC ANALYSIS

Fig. 8 displays the spectral comparison of SN 2018zd with a selected sample and model spectra obtained at different phases, including the flash-ionization, photospheric, and nebular phases.

### 4.1 Flash-ionization phase

Panel (a) of Fig. 8 displays early-time spectra of SN 2018zd at  $t \lesssim 10$  d, together with those of SN 1998S, SN 2013fs, and the r1w5h model spectra given by Dessart et al. (2017) at similar phases. The spectra of SN 2018zd are dominated by flash-ionized features (Gal-Yam et al. 2014) such as the narrow emission lines of hydrogen, N V  $\lambda\lambda 4334, 4641$ , He II  $\lambda 4686$ , He II  $\lambda 4860$ , C IV  $\lambda\lambda 5801, 5812$ , and C IV  $\lambda 7110$ . These features are generated by the surrounding

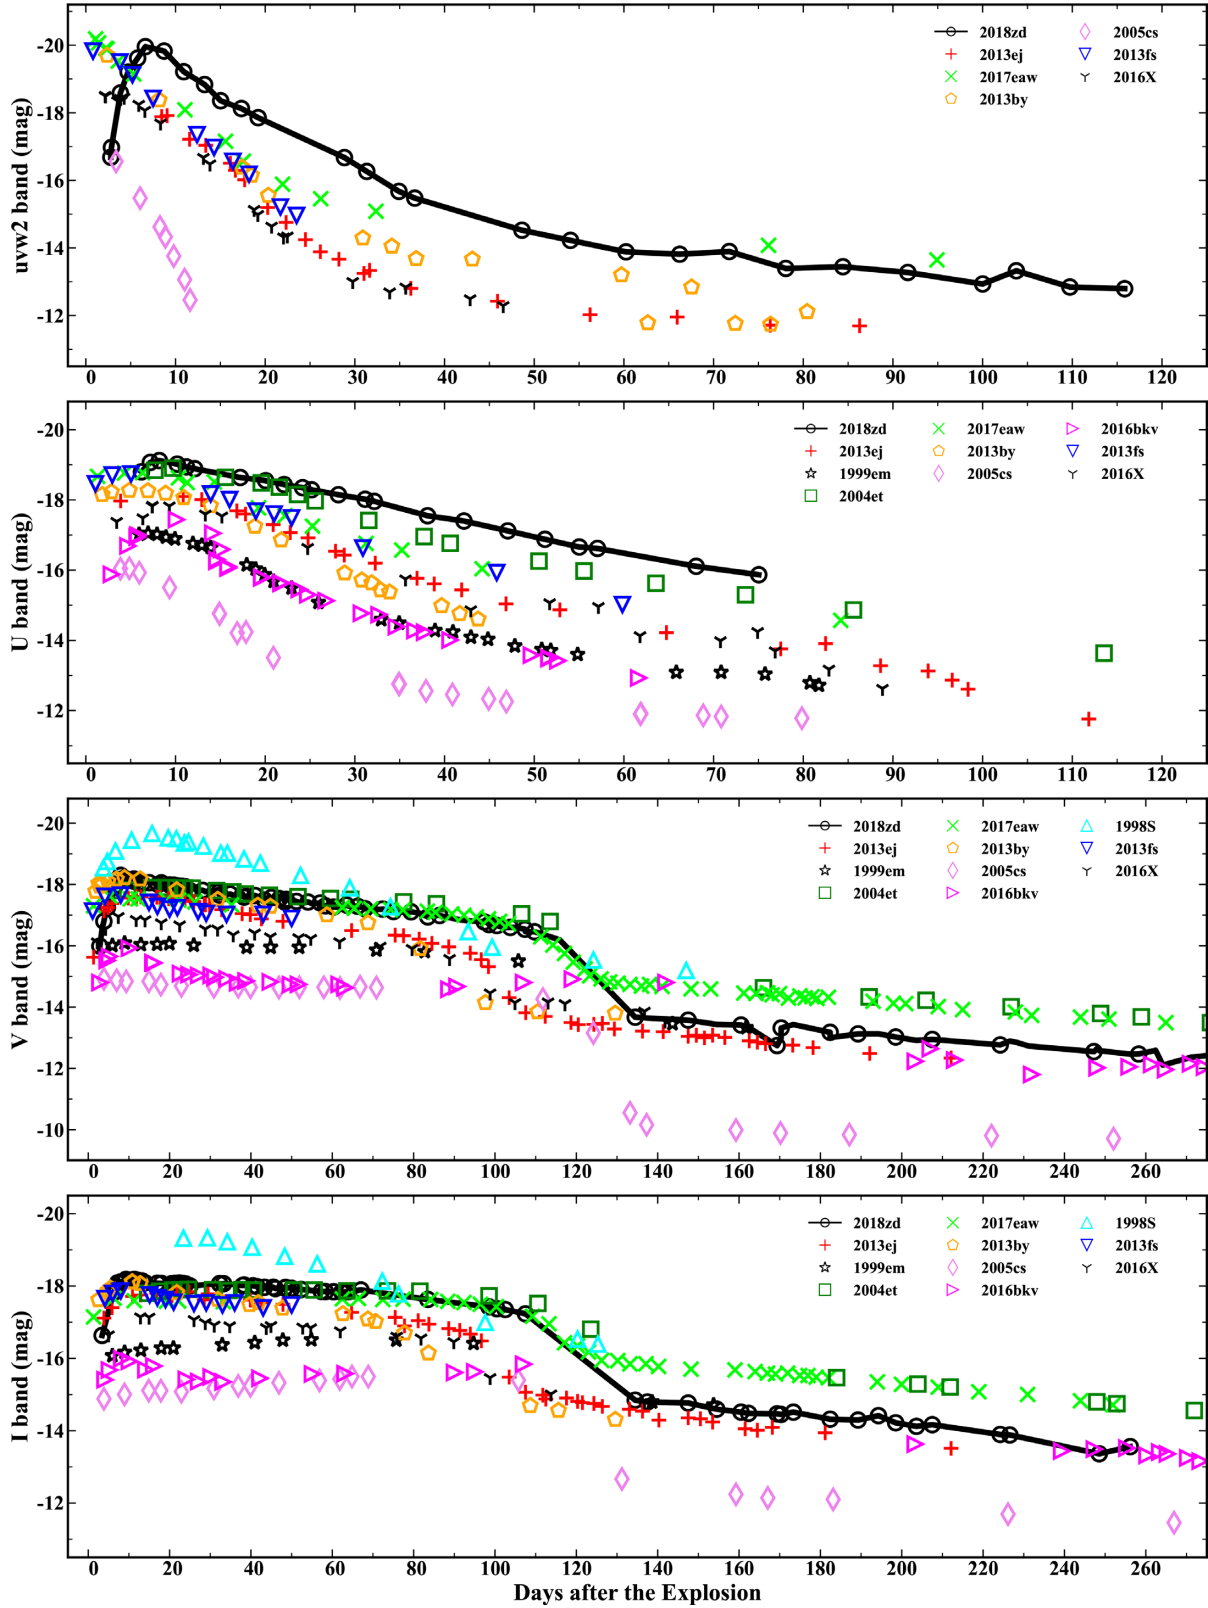

**Figure 5.** Light-curve comparisons (in absolute magnitude) between SN 2018zd with some well studied SNe II, including the standard SNe IIP 1999em (Hamuy et al. 2001; Leonard et al. 2002; Elmhamdi et al. 2003) and 2004et (Sahu et al. 2006; Misra et al. 2007), the normal SN IIP 2017eaw (Rui et al. 2019; Szalai et al. 2019, and unpublished data collected with LJT and TNT), the fast-declining SNe II 2013ej (Huang et al. 2015; Dhungana et al. 2016; Yuan et al. 2016) and 2013by (Valenti et al. 2015), the low-velocity and low-luminosity SN IIP 2005cs (Pastorello et al. 2006, 2009), and SNe II showing interaction signatures in their spectra such as SNe 2013fs (Yaron et al. 2017; Bullivant et al. 2018), 2016bkv (Hosseinzadeh et al. 2018; Nakaoka et al. 2018), and 1998S (Leonard et al. 2000; Fassia et al. 2000; Poon et al. 2011).

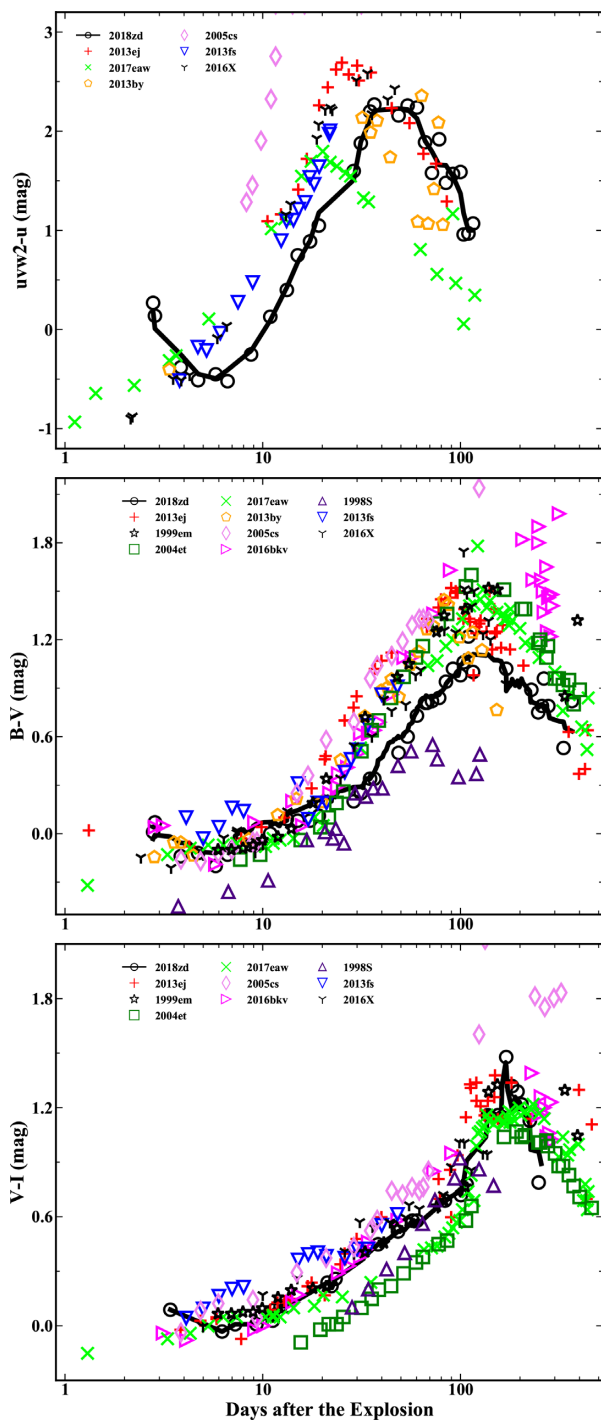

**Figure 6.** The  $uvw1 - u$ ,  $B - V$ , and  $V - I$  colours of SN 2018zd compared with those of the sample presented in Fig. 5. All of these colour curves have been corrected for host-galaxy and Milky-Way extinction.

wind material that was ionized by X-rays from the shocked ejecta (Branch & Wheeler 2017). The first two low-quality spectra of SN 2018zd in Fig. 3 show possible  $H\alpha$  emission, suggesting that the interaction starts  $\sim 1.2$  d after explosion.

The flash features in SN 2018zd appear to evolve more slowly than in SN 2013fs. A noticeable change from  $t \approx 4.4$  to  $t \approx 6.3$  d is the weakening of  $N\text{V } \lambda\lambda 4634, 4641$ , which suggests decreasing ionization. However, this seems to conflict with the increasing surface

temperature inferred at this phase (see Section 3.5); perhaps the temperature derived from the SED may not fully reflect radiation in the ionization region.

The spectra of SN 1998S at  $t \approx 2.3$  and 3.3 d are similar to that of SN 2018zd at  $t \approx 4.4$  d. The similarity of the two spectra of SN 1998S (separated by 1 d) might suggest slower spectral evolution than that of SN 2018zd. In contrast, SN 2013fs went through very rapid changes during the first few days after the explosion. The narrow emissions seen in SN 2013fs showed pronounced variations on a time-scale of hours and almost vanished  $\sim 2$  d after the explosion.

Dessart et al. (2017) applied radiation hydrodynamics and non-local-thermodynamic-equilibrium (NLTE) radiative transfer to produce observational features of SNe II with short-lived flash spectra considering different physical states of the progenitor before the explosion. The ionization features produced in the r1w5h (where r1 means a progenitor star radius with  $R_* = 501 R_\odot$ , w5 means a wind mass-loss rate of  $\dot{M} = 5 \times 10^{-3} M_\odot \text{ yr}^{-1}$ , and h means an atmospheric density scale height of  $H_p = 0.1 R_*$ ) model is the closest to that seen in SN 2018zd among their models.

One can see that the r1w5h model can reproduce the dominant spectral features observed in SN 2018zd, but the model evolves too fast. For example, the model spectrum at  $t \approx 0.8$  d shows a similar continuum and spectral features (e.g.  $N\text{V}$  and  $\text{He II}$  lines) to the  $t \approx 4.4$  d spectrum of SN 2018zd. The Balmer lines in the model spectrum at  $t = 1.0$  d exhibits line features similar to those in the  $t \approx 8.3$  d spectrum of SN 2018zd. The continuum of the featureless model spectrum at  $t = 2.0$  d has a slope similar to that of SN 2018zd at  $t \approx 8.3$  d.

The slower spectral evolution and the longer-lived flash features of SN 2018zd in comparison with SN 2013fs and the r1w5h model are consistent with the slower light-curve rise seen in SN 2018zd. This difference might suggest a more massive and extended stellar wind surrounding SN 2018zd. On the other hand, the spectral evolution of SN 2018zd during the flash phase seems to be faster than that of SN 1998S. Therefore, we propose that SN 2018zd might have an environment (e.g. the mass of wind/CSM) lying between that of SN 2013fs and SN 1998S in mass immediately before the explosion.

## 4.2 Photospheric phase

Panel (b) of Fig. 8 displays spectra of SN 2018zd from  $t \approx 12$  to  $t \approx 68$  d compared with photospheric-phase spectra of SNe 1999em and 2005cs, as well as spectra of SNe 1998S, 2013by, 2013ej, and 2013fs at similar epochs.

At this phase, the spectra of SN 2018zd are still characterized by a featureless blue continuum, likely due to continuous heating by CSM interaction. Consequently, the spectrum of SN 2018zd at  $t \approx 12$  d looks younger than that of SN 2005cs at  $t \approx 3$  d and SN 1999em at  $t \approx 4$  d; it has a bluer colour and a weaker P Cygni  $H\alpha$  profile. Given its blue and featureless spectrum, SN 2018zd might be classified as a very young SN II (e.g. 1–2 d after the explosion) if it had not been spectrally observed until  $t \approx 12$  d. Moreover, cross-correlation with a library of SN spectra using the supernova identification code (SNID; Blondin & Tonry 2007) shows that spectra of SN 2018zd at  $t \approx 23, 43,$  and  $68$  d respectively match those of SN 2005cs at  $t \approx 4, 10,$  and  $13$  d, SN 1999em at  $t \approx 6, 11,$  and  $33$  d, and SN 2004et at  $t \approx 7, 9,$  and  $40$  d.

Khazov et al. (2016) reported that 14 per cent of their SN II sample observed at  $t < 10$  d show flash spectral features. This fraction might be underestimated because interaction makes SNe II look somewhat younger than their real age. For example, SN 2018zd might have



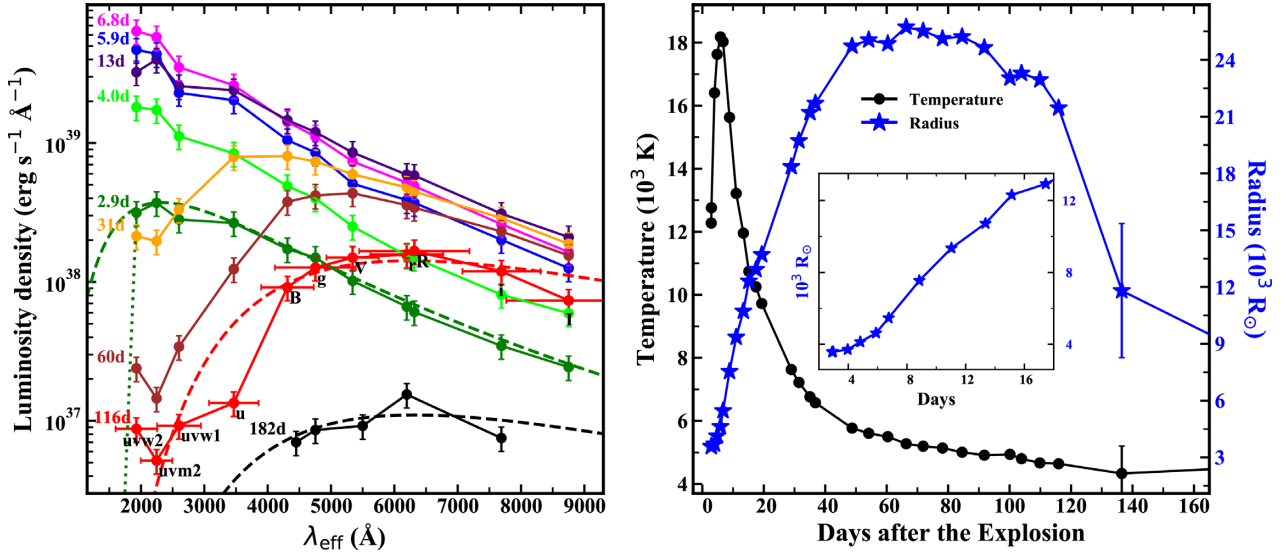

**Figure 7.** Left: SED of SN 2018zd at selected phases. The dashed lines are examples of blackbody fits to the observations at  $t = 2.9$  and 182 d. The dotted line is the flux extrapolation of the flux at wavelengths shorter than 1928 Å; the flux at wavelengths shorter than 1216 Å goes to zero due to the absorption of H-rich atmosphere. The uncertainty of each SED is about 20 per cent, including errors in photometry, extinction, and distance. Right: Temporal evolution of the temperature and the photospheric radius of SN 2018zd. The inset shows a close-up view of the radius at  $t < 18$  d. The typical uncertainty of the temperature is about 20 per cent, including errors in photometry, extinction, and blackbody fitting. The typical uncertainty of the radius is about 30 per cent, including errors in temperature and distance; see the sample errors at  $t \approx 137$  d.

been counted as a young SN II without flash features if both the discovery date and classification date had been delayed by  $\sim 10$  d.

At  $t \approx 13$  d, the spectrum of SN 2018zd looks similar to that of SN 1998S at a comparable phase, but it shows a more pronounced P Cygni profile of the  $H\alpha$  line than the latter. The spectrum of SN 2013fs at  $t \approx 13$  d exhibits a redder continuum and more noticeable Balmer lines than that of SN 2018zd, suggesting short-lived contribution of ionization/interaction in the former, as seen in the flash phase.

The evolution in the light curve, surface radius, and temperature indicate that SN 2018zd starts recombination at  $t \approx 40$  d. After this phase, the spectrum of SN 2018zd (e.g.  $t \approx 43$  d) evolves to be like that of SNe IIP. For example, the spectrum of SN 2018zd at  $t \approx 68$  d is somewhat similar to that of SN 1999em at  $t \approx 40$  d, but with narrower and shallower spectral features. The contribution of CSM interaction still exists  $\sim 2$  months after the explosion, as suggested by the bluer  $uvw2 - u$  and  $B - V$  colours of SN 2018zd at the same phase.

The EW ratio between the blue absorption wing and red emission wing of  $H\alpha$  in spectra of SN 2018zd ( $R_{H\alpha} \approx 0.3$ ) is smaller than that of SN 1999em ( $R_{H\alpha} \approx 0.6$ ) but larger than that of SN 2013by ( $R_{H\alpha} \approx 0.1$ ) at  $t \approx 20$ –30 d. SN 1998S does not show a well developed  $H\alpha$  absorption component at  $t \approx 71$  d ( $R_{H\alpha} < 0.1$ ). The relatively weak  $H\alpha$  absorption of SN 2013by and SN 19998S is usually seen in other SNe IIL (Schlegel 1996). The narrower  $H\alpha$  profile and the lower  $R_{H\alpha}$  of SN 2018zd might be related to a slower bulk expansion velocity than that of typical SNe IIP (Dessart et al. 2009). This is consistent with the low expansion velocity of SN 2018zd seen in Sections 5.1 and 5.3.

### 4.3 Nebular phase

In the nebular phase, the spectra of SN 2018zd evolve to be more like those of a normal SN IIP, dominated by emission lines of [O I],

$H\alpha$ , [Fe II], [Ca II], and Ca II. Panel (c) of Fig. 8 shows three nebular spectra of SN 2018zd and model spectra of different progenitor masses (Jerkstrand et al. 2012). Comparison of the strength of [O I]  $\lambda\lambda 6300, 6364$  between the observation and model suggests that the progenitor mass of SN 2018zd is in the range from 12–15  $M_{\odot}$ , but preferring a lower mass.

The inset panel shows a close-up view of the  $H\alpha$  emission; the profile of it has been corrected for the instrumental broadening effect,  $\text{FWHM}_{\text{corr}} = (\text{FWHM}_{\text{obs}}^2 - \text{FWHM}_{\text{inst}}^2)^{1/2}$ , where  $\text{FWHM}_{\text{obs}}$  is the observed full width at half-maximum intensity (FWHM), and  $\text{FWHM}_{\text{inst}}$  is the instrumental FWHM. This emission becomes progressively narrower from  $t \approx 182$  to  $t \approx 338$  d, and then it levels off. The asymmetric  $H\alpha$  emission at  $t \approx 399$  d might imply an asymmetric structure in the inner part of this SN.

Maguire et al. (2012) reported a relation that can be roughly used to estimate the  $^{56}\text{Ni}$  mass from  $\text{FWHM}_{\text{corr}}$ :  $M(^{56}\text{Ni}) = A \times 10^{B \times \text{FWHM}_{\text{corr}}} M_{\odot}$ , where  $B = 0.233 \pm 0.0041$  and  $A = 1.81_{-0.68}^{+1.05} \times 10^{-3}$ . The  $\text{FWHM}_{\text{corr}}$  of SN 2018zd at  $t \approx 399$  d is measured as  $54.2 \pm 1.0$  Å, which yields  $M(^{56}\text{Ni}) = 0.033 \pm 0.004 M_{\odot}$ . This estimate is consistent with the value derived from the light-curve tail (see Section 5.2).

## 5 DISCUSSION

### 5.1 Ejecta velocities

The ejecta velocities of SN 2018zd measured from the absorption minima (including  $H\alpha$ ,  $H\beta$ , Fe II  $\lambda 5018$ , Fe II  $\lambda 5169$ , Sc II  $\lambda 6246$ , Si II  $\lambda 6355$ , and Ca II  $\lambda 8662$ ) and the expanded photospheric radius are presented in the top panel of Fig. 9. For comparison, the ejecta velocities of SNe 1999em, 1998S, 2005cs, and 2016bkv derived from absorption minima of  $H\alpha$  and Fe II  $\lambda 5169$  are plotted in the bottom panel.

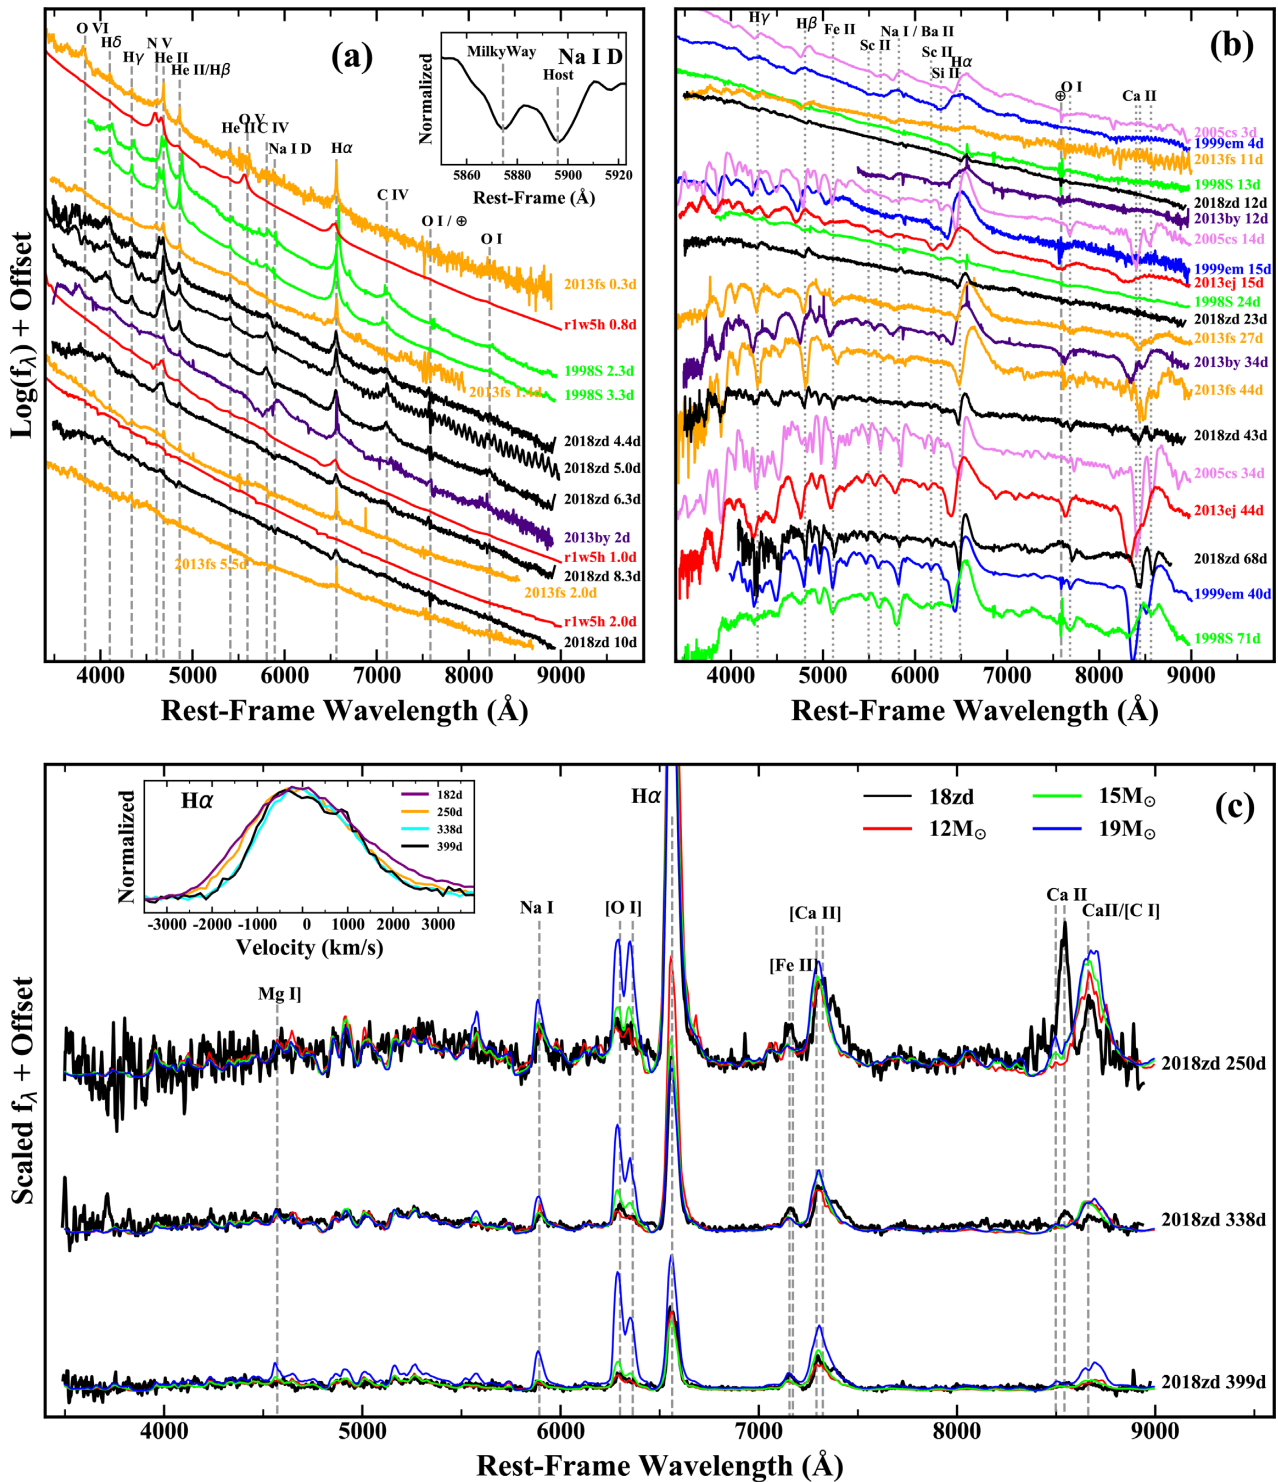

**Figure 8.** Spectral comparison at three phases. (a) Flash-ionization-phase spectra of SN 2018zd compared with spectra of SN 1998S (Leonard et al. 2000; Fassia et al. 2001; Shivvers et al. 2015), SN 2013by (Valenti et al. 2015), SN 2013fs (Yaron et al. 2017), and model spectra r1w5h of Dessart, Hillier & Audit (2017). The inset shows a close-up of the region of Na I D absorption in the spectrum of SN 2018zd at  $t \approx 5$  d. (b) Photospheric-phase spectra of SN 2018zd along with those of SN 1998S, SN 1999em (Hamuy et al. 2001; Leonard et al. 2002), SN 2005cs (Pastorello et al. 2006), SN 2013by, SN 2013ej (Dhungana et al. 2016), and SN 2013fs. (c) Three nebular-phase spectra of SN 2018zd (at 250, 338, and 399 d) compared with model spectra corresponding to different progenitor masses (Jerkstrand et al. 2012; 12 M $_{\odot}$  at 250, 306, and 400 d; 15 M $_{\odot}$  at 250, 332, and 400 d; and 19 M $_{\odot}$  at 250, 332, and 369 d). The model spectra are scaled to the distance of SN 2018zd and its  $^{56}\text{Ni}$  mass. The inset shows the velocity distribution of the H $\alpha$  emission of SN 2018zd at  $t = 182, 250, 338,$  and  $399$  d; the instrumental resolution was removed via  $\text{FWHM}_{\text{corr}} = (\text{FWHM}_{\text{obs}}^2 - \text{FWHM}_{\text{inst}}^2)^{1/2}$ , where the instrumental FWHM was measured from the night-sky emission lines. In panels (a) and (c), dashed lines mark spectral features at rest; in panel (b), dotted lines indicate spectral features at  $v = -3500$  km s $^{-1}$ . In panels (a) and (b), residuals from incomplete removal of telluric absorption are marked with an Earth symbol. The host-galaxy redshift and the extinction from the host galaxy and the Milky Way have been removed.

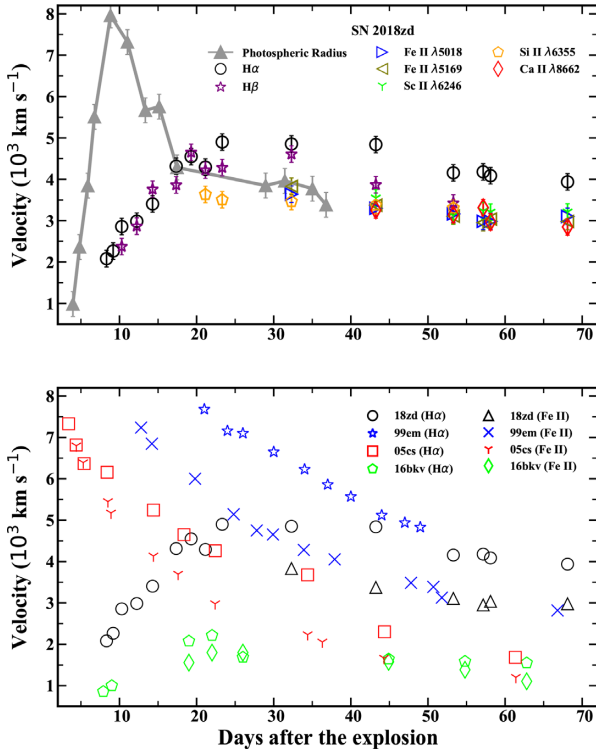

**Figure 9.** Top: Ejecta velocity of SN 2018zd derived from the absorption minima of  $H\alpha$ ,  $H\beta$ ,  $\text{Fe II } \lambda 5018$ ,  $\text{Fe II } \lambda 5169$ ,  $\text{Sc II } \lambda 6246$ ,  $\text{Si II } \lambda 6355$ , and  $\text{Ca II } \lambda 8662$ . The velocity derived from the photospheric radius presented in Fig. 7 is also plotted. Bottom: Ejecta velocity of SNe 2018zd, 1999em, 2005cs, and 2016bkv derived from the absorption minima of  $H\alpha$  and  $\text{Fe II } \lambda 5169$ . The uncertainty is about  $200\text{--}300 \text{ km s}^{-1}$ .

The velocity derived from the expanding photospheric radius of SN 2018zd ( $v = \Delta R/\Delta t$ ) is  $\sim 1000 \text{ km s}^{-1}$  at  $t \approx 4 \text{ d}$ , which accelerates at an average of  $1200 \text{ km s}^{-1} \text{ d}^{-1}$  in the next five days. It reaches the maximum velocity ( $\sim 8000 \text{ km s}^{-1}$ ) at  $t \approx 8.8 \text{ d}$  when the bolometric luminosity rises to a peak. This velocity decreases quickly during the next week and reaches a velocity plateau at  $\sim 3600 \text{ km s}^{-1}$ . The acceleration inferred from the photospheric radius might relate to the surrounding density structure of the SN. A CSM cloud with a density profile increasing outward may absorb progressively more energy from the shock, resulting in a fast-rising luminosity curve that may mimic the accelerating expansion of the photosphere.

The remarkable acceleration is seen in the velocity derived from the absorption minima of  $H\alpha$  and  $H\beta$  of SN 2018zd at  $t \lesssim 20 \text{ d}$ . At the same phase, the  $H\alpha$  velocity of SN 2016bkv shows a similar increase, as noted by Nakaoka et al. (2018). This acceleration might imply distinct line-forming regions. At early phases, weak H absorption forms in the wind/CSM that is above the optically thick photosphere. The shocked ejecta ionize and accelerate this material to yield the observed spectral lines and acceleration. The H absorption lines in the well developed P Cygni profile at  $t > 20 \text{ d}$  form in the ejecta that decelerate owing to obstruction by the outer material.

At  $t > 20 \text{ d}$ , some well developed absorptions can be used to estimate the velocity of SN 2018zd besides those of the H lines. The velocity derived from those absorptions at  $t \approx 30 \text{ d}$  is close to that from the photospheric radius but is  $\sim 1000 \text{ km s}^{-1}$  slower than that from H lines. As usually seen in the normal SNe IIP, the velocity derived from H lines is higher than those from the other ions (Leonard et al. 2002). Considering these differences, we use

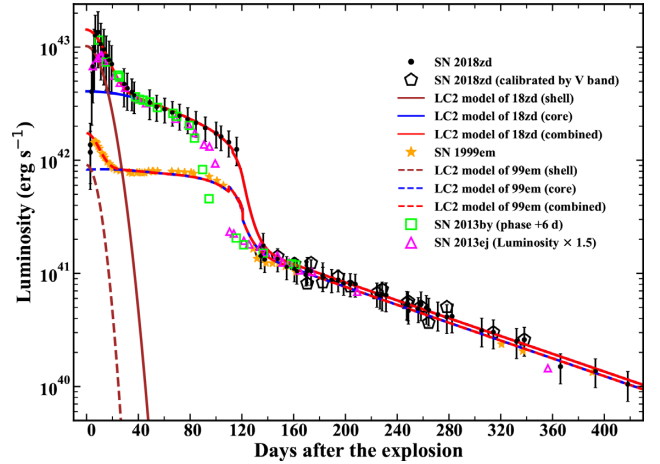

**Figure 10.** Bolometric light curve of SN 2018zd compared with those of SN 1999em, SN 2013by, SN 2013ej and the results of the LC2 model. The error bars include uncertainties in the photometry, extinction, and distance, the last two of which greatly dominate. The LC2 model contains the contribution of the core and the shell. The phase of SN 2013by has been shifted by +6 d corresponding to the archival explosion date (MJD = 56403.5; Valenti et al. 2015). The luminosity of SN 2013ej has been multiplied by 1.5.

$\text{Fe II } \lambda 5169$  and  $\text{Sc II } \lambda 6246$  as the tracker of photospheric velocity instead of H lines, as suggested by Hamuy (2003) and Maguire et al. (2010). The velocity of SN 2018zd at  $t = 50 \text{ d}$  interpolated by the velocity of  $\text{Fe II } \lambda 5169$  and  $\text{Sc II } \lambda 6246$  is about  $3300 \text{ km s}^{-1}$ , which is on the slow side of normal SNe IIP (as seen in Section 5.3) and is faster than low-velocity SNe IIP (e.g. SN 2005cs).

## 5.2 Bolometric flux and explosion parameters

Fig. 10 displays the bolometric light curve of SN 2018zd based on the SED presented in Section 3.5. The flux at wavelengths redder than the photometry is derived by extrapolating a blackbody fit to the SED. The flux at wavelengths shorter than  $1216 \text{ \AA}$  is assumed to be zero because of absorption in the H-rich atmosphere (Lyman series). At  $t < 115 \text{ d}$ , when UV photometry is available, we extrapolate the  $uvw2$ -band (or the  $uvm2$  band if  $uvw2 - u \gtrsim 1.0 \text{ mag}$  to avoid the red leak of the  $uvw2$  band; Brown et al. 2016) flux using a straight line to zero flux at  $1216 \text{ \AA}$  (as seen in Fig. 7). In the tail phase, we omit the flux at wavelengths shorter than  $3600 \text{ \AA}$  and extrapolate the flux beyond the wavelength range covered by the photometry via the blackbody directly. The latter treatment yields a luminosity match to that derived using the  $V$ -band photometry via the equation (Bersten & Hamuy 2009)<sup>10</sup> during  $135 \text{ d} \lesssim t \lesssim 338 \text{ d}$ :

$$\log L = -0.4[BC + V - A_V + 11.64] + \log(4\pi D^2), \quad (1)$$

where  $L$  is given in units of  $\text{erg s}^{-1}$ , the colour term  $BC = -0.7 \text{ mag}$ , and  $D$  is the SN distance in units of cm.

The bolometric light curves of SN 1999em, SN 2013by, and SN 2013ej produced by the same method, and the bolometric light curve generated by the two-component model (LC2) of Nagy & Vinkó (2016), are also shown for comparison. LC2 is a semi-analytical light-curve model, which computes the bolometric light curve of

<sup>10</sup>The ‘ $-11.64$ ’ in equation (4) of Bersten & Hamuy (2009) is altered to ‘ $+11.64$ ’ to correct the typo.

a homologous expanding supernova using the radiative diffusion approximation as introduced by Arnett & Fu (1989).

SN 2018zd reached its bolometric peak at  $t \approx 8.8$  d,  $L_{\max} = (1.36 \pm 0.63) \times 10^{43}$  erg s $^{-1}$ , higher than that of SN 1999em by a factor of eight, as listed in Table 2. The large peak luminosity of SN 2018zd is partly due to the contribution of interaction between the shocked ejecta and stellar wind/CSM. This SN reached UV and optical maxima almost simultaneously, which also helps to explain the higher peak bolometric luminosity. At the tail phase ( $t \gtrsim 130$  d), however, these two SNe are found to have similar luminosity ( $L \approx 1.2 \times 10^{41}$  erg s $^{-1}$  at  $t \approx 150$  d) and decline rate ( $\sim 0.98$  mag 100 d $^{-1}$ ), as expected from Co $\rightarrow$ Fe decay).

The expansion velocity of SN 2018zd matches that of SN 1999em within  $\sim 200$  km s $^{-1}$  at  $t \approx 50$  d, as presented in Fig. 9. They are expected to have a similar middle plateau luminosity at a statistical uncertainty of 0.5 mag if they follow the velocity–luminosity relation (Hamuy 2003), as seen in panel (a) of Fig. 11. Moreover, SN 2018zd exhibits a tail similar to that of SN 1999em after the contribution of CSM interaction disappeared. Thus, it might be reasonable to assume that the energy produced in the explosion of SN 2018zd is close to that of SN 1999em at the uncertain level of the velocity–luminosity relation if the former has no extra energy input from the interaction. Assuming that all of the excess emission inferred in SN 2018zd relative to that of SN 1999em is converted from the kinetic energy of the ejecta ( $M_{\text{wind}} = \int_3^{120} [L_{18zd}(t) - L_{99em}(t)]/v_{\text{ej}}^2(t) dt$ , where the photospheric ejecta velocity  $v_{\text{ej}}(t)$  is derived from the absorption minimum of Fe II lines, as presented in Fig. 9;  $v_{\text{ej}}(t)$  at  $t > 70$  d is set to 3300 km s $^{-1}$ ; the integration limit is from the first date when SN 2018zd has multi-band photometry to the end of the plateau phase), we find that  $0.18_{-0.10}^{+0.05} M_{\odot}$  of wind material is required to produce the extra flux seen in SN 2018zd. The uncertainty in the wind-mass estimate includes the uncertainties in bolometric flux and the velocity–luminosity relation. This stellar wind is more massive than that of SN 2013fs ( $\lesssim 0.01 M_{\odot}$ ; estimated via the line luminosity of the narrow H $\alpha$  emission in Yaron et al. 2017, and spectral modelling in Dessart et al. 2017) but less massive than that of SN 1998S ( $\sim 0.4 M_{\odot}$ ; derived from spectral modelling in Dessart et al. 2016).

SN 2013by shows a bolometric light curve similar to that of SN 2018zd at  $t \lesssim 80$  d if its epoch is shifted by +6 d. Given that the closest available predisccovery image of SN 2013by is about 22 d earlier than the discovery image (Parker et al. 2013) it is possible that SN 2013by exploded a few days earlier than the explosion date reported by Valenti et al. (2015). Thus, we adopt MJD = 56397.5 as the explosion date of SN 2013by for the following calculation. With this modified explosion date, the colour curve and light curve of SN 2013by match those of SN 2018zd better. At  $t > 80$  d, SN 2013by ends the plateau phase and fades quickly. However, its tail luminosity meets that of SN 2018zd again.

The bolometric light curve of SN 2013ej roughly matches that of SN 2018zd and SN 2013by except for the middle part ( $80 \text{ d} \lesssim t \lesssim 120 \text{ d}$ ) if the luminosity of SN 2013ej is multiplied by 1.5. These three SNe show a faster-declining plateau and a more significant drop from the plateau to the radioactive tail than does SN 1999em.

We estimate the mass of  $^{56}\text{Ni}$  ejected by the SN based on the tail bolometric luminosity via (Hamuy 2003):

$$M_{\text{Ni}} = (7.866 \times 10^{-44}) L_t \times \exp \left[ \frac{t/(1+z) - 6.1}{111.26} \right] M_{\odot}, \quad (2)$$

where  $t$  is the phase after explosion,  $L_t$  is the tail-phase luminosity in units of erg s $^{-1}$ , and  $z$  is the redshift of the SN. SN 2018zd, SN 1999em, and SN 2013by produced similar amounts of  $^{56}\text{Ni}$ , as listed in Table 2, given the similar radioactive tails.

It is not surprising to see that the mass of  $^{56}\text{Ni}$  derived by the LC2 model,  $0.033 M_{\odot}$ , is consistent with the above results, because they rely on a shared physical basis (Arnett 1982; Arnett & Fu 1989). Thus, the mean value of  $M(^{56}\text{Ni})$  derived via the tail-phase flux matches the result from the nebular spectra. Since the estimate from the nebular spectra relies only on the FWHM of H $\alpha$  emission, which is independent of distance and extinction, the agreement between these two methods suggests that the distance and extinction of SN 2018zd adopted in this paper are reasonable.

The LC2 model reproduces the light curve of SN 1999em and also the light curve of SN 2018zd at  $t \gtrsim 10$  d with the parameters listed in Table 3. Note that all models shown are not from formal fitting to the data. Instead, they can be considered only as representative examples that look similar to the observations. Thus, formal uncertainties cannot be assigned to the parameters shown in Table 3, but they are at least  $\sim 10$  per cent according to Nagy & Vinkó (2016).

The velocity derived in the LC2 model is about 2000 km s $^{-1}$  higher than that of SN 2018zd obtained from the spectral features, as presented in Section 5.1. This suggests that extra energy is required to produce such a luminous SN in the scheme of regular SNe IIP. A significant amount of the SN kinetic energy may be converted to thermal energy via the CSM interaction, conforming to the high temperature seen in Fig. 7.

### 5.3 Comparison with other SNe II

Fig. 11 displays the position of SN 2018zd in the spectroscopic and photometric parameter space of SNe II. Comparing with the linear fitting in each panel, we note the following:

- (1) The peak ( $M_{\max}$ ) and middle plateau ( $M_{\text{V}}^{50}$ ) of SN 2018zd are (respectively)  $1.50 \pm 0.75$  mag and  $1.75 \pm 0.53$  mag brighter than the sample SNe with a similar decline rate  $s_2$  (Anderson et al. 2014) and ejecta expansion velocity ( $v_{\text{exp}}^{50}$ ) in panels (a) and (c).
- (2) SN 2018zd experienced a significant luminosity drop from the peak to the tail, a  $\sim 2\sigma$  departure from the linear fitting of  $M_{\max}$  versus  $M_{\text{tail}}$  in panel (e).
- (3) The tail brightness of SN 2018zd follows that of the SN II family. For example, the mass of synthesized  $^{56}\text{Ni}$  in SN 2018zd matches the  $v_{\text{exp}}^{50}$  versus  $M(^{56}\text{Ni})$  relation in panel (b), and the brightness at the beginning of the tail phase is located in the  $1\sigma$  region of  $s_2$  versus  $M_{\text{end}}$  space in panel (d).

Two other SNe II, SN 2013ej and SN 2013by, show somewhat similar behaviour not only in bolometric light curves but also their positions in the SN II family. They have an intermediate flux drop during the transition from the plateau to the radioactive tail, smaller than that of SN 2018zd but more significant than the sample cluster. Combined with their fast light-curve decline rate during the photospheric phase, these two SNe might have extra energy injected by CSM interaction. Valenti et al. (2015) also suggest that the interaction scenario explains the fast-declining light curves of SN 2013by based on the flash spectral features in the spectrum at  $t \approx 2$  d (as seen in Fig. 8) and the detection of the X-ray emission. Moreover, Morozova et al. (2017) use a dense wind-like CSM interaction model to produce the luminous and fast-declining light curve of SN 2013ej and SN 2013by. The brightness of SN 2013ej and SN 2013by in the middle of the plateau phase follows the velocity–luminosity relation of SNe IIP, as seen in panel (a) of Fig. 11. It seems that the extra energy in these two SNe disappeared at  $t \approx 50$  d, which suggests an interaction lasting for a period shorter than that of SN 2018zd.

**Table 2.** Parameters of bolometric light curves.<sup>a</sup>

| Supernova | Distance (Mpc) | $E(B - V)_{\text{total}}$ | $L_{\text{peak}} (10^{43} \text{ erg s}^{-1})$ | $M(^{56}\text{Ni}) (M_{\odot})^b$ | Explosion date (MJD) | Ref. <sup>c</sup> |
|-----------|----------------|---------------------------|------------------------------------------------|-----------------------------------|----------------------|-------------------|
| SN 2018zd | 18.4 (4.5)     | 0.17 (0.05)               | 1.36 (0.63)                                    | 0.035 (0.012)                     | 58178.4 (0.5)        | 1                 |
| SN 1999em | 8.2 (0.6)      | 0.10 (0.05)               | 0.15 (0.03)                                    | 0.033 (0.006)                     | 51475.1 (1.4)        | 2                 |
| SN 2013by | 14.8 (1.0)     | 0.20 (0.03)               | 1.15 (0.24)                                    | 0.036 (0.006)                     | 56397.5 (2.0)        | 3,1               |
| SN 2013ej | 9.6 (0.7)      | 0.10 (0.03)               | 0.57 (0.08)                                    | 0.024 (0.005)                     | 56496.5 (1.5)        | 4                 |

Note. <sup>a</sup>The parameters in Fig. 10. The numbers given in the brackets are the  $1\sigma$  uncertainties. <sup>b</sup>Mass of  $^{56}\text{Ni}$  derived by the bolometric luminosity during  $130 \text{ d} \lesssim t \lesssim 180 \text{ d}$  via equation (2). <sup>c</sup>References for the distance, reddening and explosion date adopted in the calculation: 1. This work, 2. Leonard et al. (2002), 3. Valenti et al. (2015), 4. Huang et al. (2015).

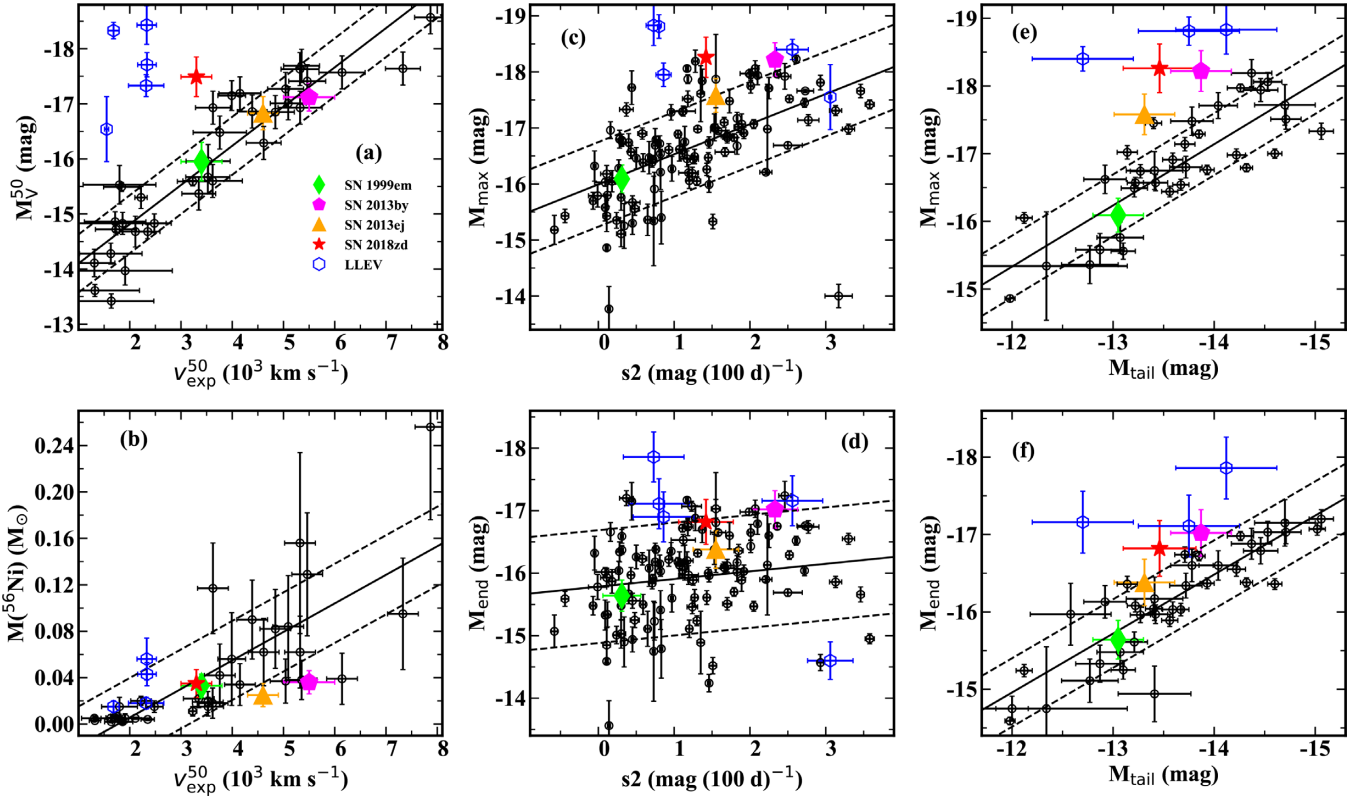

**Figure 11.** The position of SN 2018zd in the SN II family considering various photometric and spectroscopic indicators, including the velocity of Sc II  $\lambda 6246$  or Fe II  $\lambda 5169$  measured at  $t \approx 50 \text{ d}$  after explosion (i.e.  $v_{\text{exp}}^{50}$ ), the V-band absolute magnitude measured at  $t \approx 50 \text{ d}$  after explosion (i.e.  $M_V^{50}$ ), the mass of  $^{56}\text{Ni}$  (i.e.  $M(^{56}\text{Ni})$ ), and four shape parameters of the V-band light curve (as defined by Anderson et al. 2014) – the absolute brightness at three selected phases (i.e.  $M_{\text{max}}$ ,  $M_{\text{end}}$ , and  $M_{\text{tail}}$ ) and the decline rate of the plateau (i.e.  $s_2$ ). The solid lines are linear fits to the black open circles (collected from Hamuy 2003; Anderson et al. 2014; Spiro et al. 2014; Zhang et al. 2014), and the dashed lines are the  $1\sigma$  uncertainties of the linear fits. SN 1999em, SN 2013ej, SN 2013by, and five luminous SNe with low expansion velocities (LLEV SNe; Rodríguez et al. 2020) are included for comparison.

SN 2018zd is an outlier in velocity–brightness space, as seen in panel (a). However, a group of luminous SNe with low expansion velocities (LLEV SNe; Rodríguez et al. 2020) is located in a more distant region relative to the bulk of the sample than SN 2018zd. The middle plateau brightness of the LLEV SNe is  $\sim 2\text{--}3 \text{ mag}$  brighter than that of SNe II with the same ejecta expansion velocity. A larger drop from the peak to the tail in the light curve is also found in the LLEV SNe. Rodríguez et al. (2020) listed the observational characteristics of the LLEV SNe that are also found in SN 2018zd, such as the ejecta–CSM interaction signs at early phases, blue  $B - V$  colours, weakness of metal lines, and luminous peak and plateau compared with the low expansion velocities. All of these properties were reproduced, assuming ejecta–CSM interaction that

lasts between 4 and 11 weeks post-explosion, in the model work of Rodríguez et al. (2020). This confirms the interaction scenario of SN 2018zd suggested by our analysis here.

#### 5.4 Electron-capture supernova

The typical temperature of the shocked CSM is  $\sim 10^9 \text{ K}$  and that of the shocked ejecta is  $\geq 10^7 \text{ K}$ , and both radiate in the X-ray band (Branch & Wheeler 2017). These X-ray photons ionize the atoms in the surrounding wind/CSM, which then radiate narrow emission lines in the UV–optical band (i.e. the flashed spectral features) owing to recombination. Thus, we expect to detect the X-rays from SNe II if this radiation is not strongly absorbed by

**Table 3.** LC2 model parameters of SN 2018zd and SN 1999em.<sup>a</sup>

| Parameter                                | SN 2018zd |            | SN 1999em |         |
|------------------------------------------|-----------|------------|-----------|---------|
|                                          | ‘core’    | ‘shell’    | ‘core’    | ‘shell’ |
| Initial                                  | model     | parameters |           |         |
| $R_0$ ( $10^{13}$ cm)                    | 4.8       | 7.0        | 3.5       | 5.0     |
| $M_{\text{ej}}$ ( $M_{\odot}$ )          | 9.80      | 0.55       | 13.50     | 0.20    |
| $M_{\text{Ni}}$ ( $M_{\odot}$ )          | 0.033     | 0          | 0.030     | 0       |
| $T_{\text{rec}}$ (K)                     | 6000      | 0          | 7000      | 0       |
| $E_{\text{kin}}$ ( $10^{51}$ erg)        | 2.20      | 1.30       | 1.48      | 0.40    |
| $E_{\text{th}}$ ( $10^{51}$ erg)         | 1.90      | 0.40       | 0.40      | 0.02    |
| $\alpha$                                 | 1.6       | 0.0        | 0.0       | 0.0     |
| $\kappa$ ( $\text{cm}^2 \text{g}^{-1}$ ) | 0.28      | 0.40       | 0.26      | 0.40    |
| Calculated                               | physical  | properties |           |         |
| $t_0$ (d)                                | 95.6      | 18.7       | 102.9     | 11.7    |
| $v$ ( $\text{km s}^{-1}$ )               | 6580      | 23 200     | 4290      | 21 300  |

Note. <sup>a</sup> $R_0$  is the initial radius of the ejecta,  $M_{\text{ej}}$  is the ejected mass,  $M_{\text{Ni}}$  is the initial nickel mass,  $T_{\text{rec}}$  is the recombination temperature,  $E_{\text{kin}}$  is the initial kinetic energy,  $E_{\text{th}}$  is the initial thermal energy,  $\alpha$  is the density profile exponent,  $\kappa$  is the opacity,  $t_0$  is the light-curve time-scale, and  $v$  is the maximum expansion velocity.

the unshocked material. However, Chandra, Chevalier & Fransson (2018) reported the non-detection of SN 2018zd with the *Swift* X-ray telescope (XRT) between 2018 March 4 and 11. They found an upper flux limit of  $5.22 \times 10^{-14} \text{ erg cm}^2 \text{ s}^{-1}$  (0.3–10 keV). Adopting  $D = 18.4$  Mpc, the upper limit for the X-ray luminosity of SN 2018zd is  $\sim 2.11 \times 10^{39} \text{ erg s}^{-1}$ , slightly less than the detected luminosity of SN 2013by ( $\sim 2.88 \times 10^{39} \text{ erg s}^{-1}$ ; Valenti et al. 2015). The weaker X-ray radiation of SN 2018zd than that of SN 2013by might be related to the stronger flash emission features of the former. It is possible that the majority of the X-ray photons from the shocked material are absorbed by the wind/CSM, producing stronger emission lines in the optical spectra.

Moriya et al. (2014) suggested that the optically bright but X-ray-faint SNe IIn can arise from electron-capture supernovae (ECSNe) that explode from super-asymptotic giant branch (super-AGB) stars (Miyaji et al. 1980; Nomoto et al. 1982; Miyaji & Nomoto 1987). Super-AGB stars have a dense and massive circumstellar environment due to their high mass-loss rate wind, which could create narrow emission lines during the SN explosion, as seen in SN 2018zd. ECSNe could be as luminous as SNe IIn at the peak phase due to the larger radius of the progenitor star, but the tail is faint because of the intrinsic low explosion energy and a small amount of  $^{56}\text{Ni}$  (Tominaga, Blinnikov & Nomoto 2013; Moriya et al. 2014). The synthesized mass of  $^{56}\text{Ni}$  in SN 2018zd is relatively small compared to its luminous peak. Furthermore, this SN produces even less  $^{56}\text{Ni}$  if a shorter distance is adopted in the calculation. For example, it yields only  $0.013 \pm 0.004 M_{\odot}$  if  $D = 11.3 \pm 2.0$  Mpc (Bottinelli et al. 1984), which is close to the upper limit mass of  $^{56}\text{Ni}$  produced in ECSNe ( $< 0.015 M_{\odot}$ ; Kitaura, Janka & Hillebrandt 2006).

Thus, given the luminous UV–optical peak, the relatively weak X-ray radiation, the massive wind/CSM environment, and the relatively small amount of synthesized  $^{56}\text{Ni}$ , an electron-capture-triggered supernova explosion is also a possible scenario for SN 2018zd.

## 6 CONCLUSIONS

We present an extensive set of observations of SN 2018zd from the early ‘flash-ionization’ spectroscopic phase (e.g.  $t \lesssim 1$  d) to the later nebular phase (e.g.  $t \approx 456$  d). The flux excess observed

in the clear-band light curve  $\sim 3.6$  h after the explosion might be a signal of shock breakout. The overluminous peak [e.g.  $L_{\text{max}} = (1.36 \pm 0.62) \times 10^{43} \text{ erg s}^{-1}$ ] of this SN accompanied by flash spectra at early times is likely caused by extra energy injection via interaction between the shocked ejecta and the massive wind ( $0.18_{-0.10}^{+0.05} M_{\odot}$ ). This effect does not disappear immediately when the flash signatures in the spectra fade away. Energy is stored in the H-rich envelope and heats it, making SN 2018zd bluer than regular SNe IIP, as seen in its colour curve and spectrum during the photospheric phase. Meanwhile, this energy makes a brighter mid-plateau for SN 2018zd than regular SNe II with the same expansion velocity. SN 2018zd is thus a gap-filler event between the central cluster and separated LLEV SNe in velocity–brightness space, perhaps implying a continuous distribution of the interaction contribution. Given the similar fast-declining light curve of SNe II reported by Huang et al. (2015) for SN 2013ej and by Valenti et al. (2015) for SN 2013by, there is a group of transitional events located at the boundary between SNe IIP and SNe IIL in the sense of decline rate. Finally, the nebular spectra and the light-curve tail of SN 2018zd resemble those of typical SNe IIP when the injected energy has been released. Thus, the observations of SN 2018zd presented in this paper are key to understanding the nature of the diverse origins of SNe II.

## ACKNOWLEDGEMENTS

An anonymous referee made many useful suggestions that improved this paper. We acknowledge the support of the staff of the LJT, TNT, XLT, KOT, WT, and Keck. Funding for the LJT has been provided by the CAS and the People’s Government of Yunnan Province. The LJT is jointly operated and administrated by YNAO and the Center for Astronomical Mega-Science, CAS. Some of the data presented herein were obtained at the W. M. Keck Observatory, which is operated as a scientific partnership among the California Institute of Technology, the University of California, and NASA; the Observatory was made possible by the generous financial support of the W. M. Keck Foundation. We are grateful for discussions with Luc Dessart, Osmar Rodríguez, Mario Hamuy, Peter Brown, Paolo Mazzali, and Pina Elena about this work.

JZ is supported by the National Natural Science Foundation of China (NSFC, grants 11773067, 11403096), by the Youth Innovation Promotion Association of the CAS (grant 2018081), and by the Ten Thousand Talents Program of Yunnan for Top-notch Young Talents. This work is sponsored (in part) by the CAS South America Center for Astronomy (CASSACA) in Santiago, Chile. XW is supported by NSFC (grants 11633002 and 11761141001) and the Major State Basic Research Development Program (grant 2016YFA0400803). JV and his group at Konkoly Observatory are supported by the project ‘Transient Astrophysical Objects’ GINOP 2.3.2-15-2016-00033 of the National Research, Development and Innovation Office (NKFIH), Hungary, funded by the European Union. RK-T is also supported by the ÚNKP-19-02 New National Excellence Program of the Ministry for Innovation and Technology. ŁW acknowledges support from the the Polish NCN DAINA grant 2017/27/L/ST9/03221 and the EC’s H2020 OPTICON grant 730890. AVF’s supernova group is grateful for financial assistance from the Christopher R. Redlich Fund, the TABASGO Foundation, and the Miller Institute for Basic Research in Science (UC Berkeley). PM acknowledges support provided by the Polish National Science Center (NCN) through grant 2016/21/B/ST9/01126. We acknowledge the Gaia Photometric Alerts group and the use of the Cambridge Photometric Calibration Server (<http://gsaweb.ast.cam.ac.uk/followup>), developed by Sergey Kozlov and maintained by Łukasz Wyrzykowski, Arancha Del-

gado, and Pawel Zielinski, funded by the European Union's Horizon 2020 research and innovation programme under grant agreement 730890 (OPTICON). KV and LK are grateful for financial support from the National Research, Development and Innovation Office (NKFIH), Hungary, under grants NKFI-K-131508 and NKFI-KH-130526. AS, AB, CK, and KV are supported by the Lendület program grant LP2018-7/2019 of the Hungarian Academy of Sciences.

## DATA AVAILABILITY

The data underlying this article are available in the article and/or in its online supplementary material.

## REFERENCES

- Adamo A. et al., 2012, *MNRAS*, 426, 1185  
 Anderson J. P. et al., 2014, *ApJ*, 786, 67  
 Arcavi I. et al., 2012, *ApJ*, 756, L30  
 Arnett W. D., 1982, *ApJ*, 253, 786  
 Arnett W. D., Fu A., 1989, *ApJ*, 340, 396  
 Bersten M., Hamuy M., 2009, *ApJ*, 701, 200  
 Blondin S., Tonry J., 2007, *ApJ*, 666, 1024  
 Bottinelli L., Gouguenheim L., Patrel G., de Vaucouleurs G., 1984, *A&A*, 56, 381  
 Branch D., Wheeler J. C., 2017, in *Supernova Explosions*, Chapter 6. Springer, Berlin  
 Brown P., Breeveld A., Roming P., Siegel M., 2016, *AJ*, 152, 102  
 Bullivant C. et al., 2018, *MNRAS*, 476, 1497  
 Chandra P., Chevalier R. A., Fransson C., 2018, *Astron. Telegram*, 11405  
 Dessart L., Hillier D. J., Audit E., 2017, *A&A*, 605, 83  
 Dessart L., Hillier D. J., Audit E., Livne E., Waldman R., 2016, *MNRAS*, 458, 2094  
 Dessart L., Hillier D. J., Gezari S., Basa S., Matheson T., 2009, *MNRAS*, 394, 21  
 Dessart L., Hillier D. J., Waldman R., Livne E., 2013, *MNRAS*, 433, 1745  
 Dhungana G. et al., 2016, *ApJ*, 822, 6  
 Elmhamdi A. et al., 2003, *MNRAS*, 338, 939  
 Fan Y.-F., Bai J.-M., Zhang J.-J., Wang C., Chang L., Xin Y., Zhang R., 2015, *Res. Astron. Astrophys.*, 15, 918  
 Faran T. et al., 2014, *MNRAS*, 445, 554  
 Fassia A. et al., 2001, *MNRAS*, 325, 907  
 Fassia A. et al., 2000, *MNRAS*, 318, 1093  
 Filippenko A. V., 1982, *PASP*, 94, 715  
 Filippenko A. V., 1988, *AJ*, 96, 1941  
 Filippenko A. V., 1997, *ARA&A*, 35, 309  
 Filippenko A. V., Matheson T., Ho L. C., 1993, *ApJ*, 415, L103  
 Fransson C. et al., 2014, *ApJ*, 797, 118  
 Gal-Yam A., 2017, *Handbook of Supernovae*. Springer, Berlin, p. 195  
 Gal-Yam A. et al., 2014, *Nature*, 509, 471  
 Garnavich P. M., Tucker B. E., Rest A., Shaya E. J., Ollin R. P., Kasen D., Villar A., 2016, *ApJ*, 820, 23  
 Gehrels N. et al., 2004, *ApJ*, 611, 1005  
 Giraud E., 1985, *A&A*, 153, 125  
 Grassberg E. K., Nadyozhin D. K., 1976, *Ap&SS*, 44, 409  
 Hamuy M., 2003, *ApJ*, 582, 905  
 Hamuy M. et al., 2001, *ApJ*, 558, 615  
 Hosseinzadeh G. et al., 2018, *ApJ*, 861, 63  
 Huang F. et al., 2012, *Res. Astron. Astrophys.*, 11, 1585  
 Huang F. et al., 2015, *ApJ*, 807, 59  
 Jerkstrand A., Fransson C., Maguire K., Smartt S., Ergon M., Spyromilio J., 2012, *A&A*, 546, 28  
 Khazov D. et al., 2016, *ApJ*, 818, 3  
 Kitaura F. S., Janka H.-T., Hillebrandt W., 2006, *A&A*, 450, 345  
 Landolt A. V., 1992, *AJ*, 104, 340  
 Leonard D. C., Filippenko A. V., Barth A. J., Matheson T., 2000, *ApJ*, 536, 239  
 Leonard D. C. et al., 2002, *PASP*, 114, 35  
 Li W. et al., 2011, *MNRAS*, 412, 1441  
 Maguire K. et al., 2010, *MNRAS*, 404, 981  
 Maguire K., Jerkstrand A., Smartt S. J., Fransson C., Pastorello A., Benetti S., Valenti S., Bufano F., Leloudas G., 2012, *MNRAS*, 420, 3451  
 Mikołajczyk P., Wyrzykowski L., 2018, *Astron. Telegram*, 12079  
 Misra K., Pooley D., Chandra P., Bhattacharya D., Ray A. K., Sagar R., Lewin W. H. G., 2007, *MNRAS*, 381, 280  
 Miyaji S., Nomoto K., 1987, *ApJ*, 318, 307  
 Miyaji S., Nomoto K., Yokoi K., Sugimoto D., 1980, *PASJ*, 32, 303  
 Moriya T. J., Tominaga N., Langer N., Nomoto K., Blinnikov S. I., Sorokina E. I., 2014, *A&A*, 569, 57  
 Morozova V., Piro A. L., Valenti S., 2017, *ApJ*, 838, 28  
 Mould J. R. et al., 2000, *ApJ*, 529, 786  
 Nagy A., Vinkó J., 2016, *A&A*, 589, 53  
 Nakaoka T. et al., 2018, *ApJ*, 859, 78  
 Nomoto K., Sparks W. M., Fesen R. A., Gull T. R., Miyaji S., Sugimoto D., 1982, *Nature*, 299, 803  
 Oke J. B. et al., 1995, *PASP*, 107, 375  
 Olivares F. et al., 2010, *ApJ*, 715, 833  
 Parker S. et al., 2013, *Cent. Bureau Electron. Telegrams*, 3506, 1  
 Pastorello A. et al., 2006, *MNRAS*, 370, 1752  
 Pastorello A. et al., 2009, *MNRAS*, 394, 2266  
 Patat F., Barbon R., Cappellaro E., Turatto M., 1993, *A&AS*, 98, 443  
 Patat F., Barbon R., Cappellaro E., Turatto M., 1994, *A&A*, 282, 731  
 Planck Collaboration I, 2014, *A&A*, 571, A1  
 Poon H., Pun J. C. S., Lam T. Y., 2011, preprint ([arXiv:1109.0899](https://arxiv.org/abs/1109.0899))  
 Popov D. V., 1993, *ApJ*, 414, 712  
 Poznanski D., Ganeshalingam M., Silverman J. M., Filippenko A. V., 2011, *MNRAS*, 415, L81  
 Pritchard T. A., Roming P. W. A., Brown P. J., Bayless A. J., Frey L. H., 2014, *ApJ*, 787, 157  
 Richardson D., Branch D., Casebeer D., Millard J., Thomas R. C., Baron E., 2002, *AJ*, 123, 745  
 Rodríguez O. et al., 2020, *MNRAS*, 494, 5882  
 Roming P. et al., 2005, *Space Sci. Rev.*, 120, 95  
 Rui L. M. et al., 2019, *MNRAS*, 485, 1990  
 Sahu D. K., Anupama G. C., Srividya S., Muneer S., 2006, *MNRAS*, 372, 1315  
 Sanders N. E. et al., 2015, *ApJ*, 799, 208  
 Schlafly E. F., Finkbeiner D. P., 2011, *ApJ*, 737, 103  
 Schlegel E. M., 1990, *MNRAS*, 244, 269  
 Schlegel E. M., 1996, *AJ*, 111, 1660  
 Schoniger F., Sofue Y., 1994, *A&A*, 283, 21  
 Shivvers I., Groh J. H., Mauerhan J. C., Fox O. D., Leonard D. C., Filippenko A. V., 2015, *ApJ*, 806, 213  
 Smith J. et al., 2002, *AJ*, 123, 2121  
 Spiro S. et al., 2014, *MNRAS*, 439, 2873  
 Stetson P., 1987, *PASP*, 99, 191  
 Stritzinger M. D. et al., 2018, *A&A*, 609, 134  
 Szalai T. et al., 2019, *ApJ*, 876, 1  
 Tartaglia L. et al., 2020, *A&A*, 635, 39  
 Tominaga N., Blinnikov S. I., Nomoto K., 2013, *ApJ*, 771, L12  
 Tully R. B., Fisher J. R., 1988, *Catalog of Nearby Galaxies*. Cambridge Univ. Press, Cambridge  
 Turatto M., Benetti S., Cappellaro E., 2003, in *Hillebrandt W., Leibundgut B., eds, From Twilight to Highlight: The Physics of Supernovae*. Springer, Berlin, p. 200  
 Tutui Y., Sofue Y., 1997, *A&A*, 326, 915  
 Valenti S. et al., 2015, *MNRAS*, 2608, 2616  
 Wang C.-J. et al., 2019, *Res. Astron. Astrophys.*, 19, 149  
 Wang X. et al., 2008, *ApJ*, 675, 626  
 Yaron O. et al., 2017, *Nat. Phys.*, 13, 510  
 Yuan F. et al., 2016, *MNRAS*, 465, 2003  
 Zhang J.-J. et al., 2014, *ApJ*, 797, 5  
 Zhang J.-J., Yu X.-G., Wang X.-F., 2018, *Astron. Telegram*, 11379  
 Zhang T.-M. et al., 2012, *AJ*, 144, 131

**Table A1.** Local photometric standard stars in the field of SN 2018zd.<sup>a</sup>

| Star | <i>U</i> (mag) | <i>B</i> (mag) | <i>V</i> (mag) | <i>R</i> (mag) | <i>I</i> (mag) | <i>g</i> (mag) | <i>r</i> (mag) | <i>i</i> (mag) |
|------|----------------|----------------|----------------|----------------|----------------|----------------|----------------|----------------|
| 1    | 14.88(0.01)    | 14.63(0.01)    | 13.79(0.01)    | 13.40(0.02)    | 13.02(0.02)    | 14.17(0.01)    | 13.56(0.01)    | 13.40(0.01)    |
| 2    | 15.47(0.01)    | 14.92(0.01)    | 13.98(0.01)    | 13.53(0.03)    | 13.12(0.01)    | 14.42(0.01)    | 13.68(0.01)    | 13.47(0.01)    |
| 3    | 16.35(0.02)    | 16.47(0.01)    | 15.93(0.02)    | 15.58(0.02)    | 15.26(0.02)    | 16.15(0.01)    | 15.78(0.01)    | 15.67(0.01)    |
| 4    | 16.49(0.01)    | 16.32(0.01)    | 15.54(0.03)    | 15.10(0.01)    | 14.69(0.01)    | 15.90(0.01)    | 15.31(0.01)    | 15.11(0.01)    |
| 5    | 17.54(0.04)    | 17.26(0.03)    | 16.41(0.03)    | 15.96(0.04)    | 15.53(0.02)    | 16.79(0.01)    | 16.18(0.01)    | 15.96(0.01)    |
| 6    | 15.48(0.02)    | 15.48(0.02)    | 14.80(0.02)    | 14.41(0.01)    | 14.04(0.01)    | 15.09(0.01)    | 14.61(0.01)    | 14.46(0.01)    |
| 7    | 17.08(0.01)    | 16.86(0.02)    | 16.06(0.02)    | 15.61(0.01)    | 15.19(0.02)    | 16.42(0.01)    | 15.82(0.01)    | 15.61(0.01)    |
| 8    | 17.48(0.02)    | 16.86(0.02)    | 15.92(0.01)    | 15.45(0.02)    | 15.03(0.02)    | 16.35(0.02)    | 15.61(0.01)    | 15.40(0.02)    |
| 9    | 17.94(0.01)    | 17.89(0.01)    | 17.08(0.01)    | 16.59(0.02)    | 16.13(0.02)    | 17.45(0.01)    | 16.83(0.01)    | 16.59(0.01)    |
| 10   | 14.56(0.01)    | 14.44(0.02)    | 13.72(0.01)    | 13.40(0.01)    | 13.08(0.01)    | 14.02(0.01)    | 13.56(0.01)    | 13.45(0.01)    |
| 11   | 17.26(0.03)    | 17.07(0.01)    | 16.27(0.01)    | 15.85(0.02)    | 15.46(0.03)    | 16.63(0.01)    | 16.04(0.01)    | 15.85(0.01)    |
| 12   | 16.85(0.01)    | 16.52(0.01)    | 15.67(0.01)    | 15.24(0.01)    | 14.83(0.03)    | 16.06(0.01)    | 15.42(0.01)    | 15.23(0.01)    |

Note. <sup>a</sup>See Fig. 1 for the finder chart of these reference stars. *UBVRI* bands are in the Vega magnitude system, *gri* bands are in the AB magnitude system. Uncertainties (in parentheses) are  $1\sigma$ .

**Table A2.** Ground-based photometry of SN 2018zd.<sup>a</sup>

| Date (UT)    | MJD      | Epoch (d) <sup>b</sup> | <i>U</i> (mag) | <i>B</i> (mag) | <i>V</i> (mag) | <i>R</i> (mag) | <i>I</i> (mag) | <i>g</i> (mag) | <i>r</i> (mag) | <i>i</i> (mag) | Facility |
|--------------|----------|------------------------|----------------|----------------|----------------|----------------|----------------|----------------|----------------|----------------|----------|
| 2018 March 4 | 58181.91 | 3.52                   | –              | 15.38(0.01)    | 15.26(0.01)    | 15.05(0.01)    | 14.91(0.01)    | –              | –              | –              | KOT      |
| 2018 March 5 | 58182.76 | 4.37                   | –              | 14.93(0.01)    | 14.73(0.01)    | –              | –              | 14.79(0.01)    | 14.76(0.01)    | 14.87(0.01)    | LJT      |
| 2018 March 7 | 58184.70 | 6.31                   | 13.30(0.02)    | 14.07(0.02)    | 13.91(0.01)    | –              | –              | 13.94(0.01)    | 13.96(0.01)    | 14.10(0.01)    | LJT      |
| 2018 March 7 | 58184.73 | 6.34                   | –              | 13.85(0.08)    | 13.96(0.05)    | 13.77(0.08)    | 13.73(0.05)    | –              | –              | –              | KOT      |
| 2018 March 8 | 58185.48 | 7.09                   | –              | 13.93(0.01)    | 13.67(0.01)    | 13.59(0.01)    | 13.57(0.01)    | –              | –              | –              | TNT      |
| 2018 March 8 | 58185.70 | 7.31                   | 13.03(0.03)    | 13.82(0.02)    | 13.65(0.01)    | –              | –              | 13.68(0.01)    | 13.70(0.01)    | 13.85(0.02)    | LJT      |

Notes. <sup>a</sup>Uncertainties (in parentheses) are  $1\sigma$ . <sup>b</sup>The epoch is relative to the explosion date, MJD = 58178.39. The full table is available online.

**Table A3.** *Swift* UVOT photometry of SN 2018zd (Vega magnitude system).<sup>a</sup>

| Date (UT)     | MJD      | Epoch (d) <sup>b</sup> | <i>uvw2</i> (mag) | <i>uvm2</i> (mag) | <i>uvw1</i> (mag) | <i>u</i> (mag) | <i>b</i> (mag) | <i>v</i> (mag) |
|---------------|----------|------------------------|-------------------|-------------------|-------------------|----------------|----------------|----------------|
| 2018 March 4  | 58181.29 | 2.90                   | 16.00(0.04)       | 15.86(0.03)       | 15.53(0.04)       | 15.17(0.04)    | 16.17(0.04)    | 15.99(0.06)    |
| 2018 March 4  | 58181.35 | 2.96                   | 15.71(0.04)       | 15.68(0.06)       | 15.34(0.04)       | 15.01(0.04)    | 16.06(0.04)    | 15.82(0.06)    |
| 2018 March 5  | 58182.35 | 3.96                   | 14.10(0.02)       | 14.19(0.02)       | 14.03(0.02)       | 13.92(0.03)    | 15.04(0.03)    | 15.01(0.04)    |
| 2018 March 6  | 58183.21 | 4.82                   | 13.48(0.02)       | 13.49(0.06)       | 13.47(0.03)       | 13.43(0.03)    | 14.61(0.03)    | 14.56(0.04)    |
| 2018 March 7  | 58184.28 | 5.89                   | 13.07(0.11)       | 13.18(0.03)       | 13.25(0.11)       | 12.96(0.04)    | 14.21(0.04)    | 14.24(0.07)    |
| 2018 March 8  | 58185.14 | 6.75                   | 12.73(0.02)       | 12.88(0.03)       | 12.79(0.07)       | 12.69(0.03)    | 13.88(0.03)    | 13.84(0.04)    |
| 2018 March 10 | 58187.23 | 8.84                   | 12.86(0.02)       | 12.89(0.02)       | 12.77(0.07)       | 12.55(0.03)    | 13.71(0.02)    | 13.61(0.03)    |

Notes. <sup>a</sup>Uncertainties (in parentheses) are  $1\sigma$ . <sup>b</sup>The epoch is relative to the explosion date, MJD = 58178.39. The full table is available online.

## SUPPORTING INFORMATION

Supplementary data are available at [MNRAS](https://www.mnras.org/) online.

**Table A2.** Ground-based photometry of SN 2018zd.<sup>a</sup>

**Table A3.** *Swift* UVOT photometry of SN 2018zd (Vega magnitude system).<sup>a</sup>

**Table A4.** Journal of spectroscopic observations of SN 2018zd.

Please note: Oxford University Press is not responsible for the content or functionality of any supporting materials supplied by the authors. Any queries (other than missing material) should be directed to the corresponding author for the article.

## APPENDIX: PHOTOMETRIC AND SPECTROSCOPIC DATA

<sup>1</sup>Yunnan Observatories (YNAO), Chinese Academy of Sciences (CAS), Kunming 650216, China

<sup>2</sup>Chinese Academy of Sciences South America Center for Astronomy, National Astronomical Observatories, CAS, Beijing 100012, China

<sup>3</sup>Key Laboratory for the Structure and Evolution of Celestial Objects, CAS, Kunming 650216, China

<sup>4</sup>Center for Astronomical Mega-Science, CAS, 20A Datun Road, Chaoyang District, Beijing 100012, China

<sup>5</sup>Physics Department and Tsinghua Center for Astrophysics (THCA), Tsinghua University, Beijing 100084, China



**Table A4.** Journal of spectroscopic observations of SN 2018zd.

| Date (UT)    | MJD      | Epoch (d) <sup>a</sup> | Range (Å) | Disp. (Å pix <sup>-1</sup> ) | Exp (s) | Airmass | Telescope + Inst. |
|--------------|----------|------------------------|-----------|------------------------------|---------|---------|-------------------|
| 2018 March 2 | 58179.61 | 1.22                   | 3500–8900 | 2.85                         | 2100    | 1.64    | LJT + YFOSC       |
| 2018 March 4 | 58181.74 | 3.35                   | 3500–8900 | 2.85                         | 750     | 2.03    | LJT + YFOSC       |
| 2018 March 5 | 58182.74 | 4.35                   | 3500–8900 | 2.85                         | 2100    | 2.00    | LJT + YFOSC       |
| 2018 March 7 | 58184.69 | 6.30                   | 3500–8900 | 2.85                         | 1500    | 1.83    | LJT + YFOSC       |
| 2018 March 9 | 58186.52 | 8.13                   | 3960–8820 | 2.78                         | 2400    | 1.30    | XLT + BFOSC       |
| 2018 March 9 | 58186.71 | 8.32                   | 3500–8900 | 2.85                         | 1200    | 1.93    | LJT + YFOSC       |

Notes. <sup>a</sup>The epoch is relative to the explosion date, MJD = 58178.39. <sup>b</sup>Blue and red sides combined; parameters listed are the average values.

The full table is available online.

**Table A5.** Clear-band photometry of SN 2018zd (‘Bright Supernovae’).<sup>a</sup>

| Date (UT)        | MJD      | Epoch (d) <sup>b</sup> | Mag  | Observer       |
|------------------|----------|------------------------|------|----------------|
| 2018 March 1.54  | 58178.54 | 0.15                   | 18.0 | Koichi Itagaki |
| 2018 March 2.49  | 58179.49 | 1.10                   | 17.8 | Koichi Itagaki |
| 2018 March 3.49  | 58180.64 | 2.25                   | 16.8 | Koichi Itagaki |
| 2018 March 3.64  | 58180.79 | 2.40                   | 16.5 | Koichi Itagaki |
| 2018 March 3.79  | 58180.94 | 2.55                   | 16.6 | Koichi Itagaki |
| 2018 March 4.53  | 58181.68 | 3.29                   | 15.5 | Yuji Tanaka    |
| 2018 March 6.54  | 58183.69 | 5.30                   | 14.2 | Yuji Tanaka    |
| 2018 March 6.71  | 58183.86 | 5.47                   | 14.4 | Koichi Itagaki |
| 2018 March 14.45 | 58191.60 | 13.21                  | 13.6 | Yuji Tanaka    |

Note. <sup>a</sup>[www.rochesterastromy.org/sn2018/sn2018zd.html](http://www.rochesterastromy.org/sn2018/sn2018zd.html); uncertainties are  $\sim 0.1$  mag, considering the translation between the clear band and the *r* band. <sup>b</sup>The epoch is relative to the explosion date, MJD = 58178.39.

<sup>6</sup>Beijing Planetarium, Beijing Academy of Science and Technology, Beijing 100044, China

<sup>7</sup>Konkoly Observatory, CSFK, Konkoly-Thege M. ut 15-17, Budapest 1121, Hungary

<sup>8</sup>ELTE Eötvös Loránd University, Institute of Physics, Pázmány Péter sétány 1/A, Budapest 1117, Hungary

<sup>9</sup>Department of Optics and Quantum Electronics, University of Szeged, Dóm tér 9, Szeged 6720, Hungary

<sup>10</sup>Key Laboratory of Optical Astronomy, National Astronomical Observatories, Chinese Academy of Sciences, Beijing 100012, China

<sup>11</sup>School of Astronomy and Space Science, University of Chinese Academy of Sciences, Beijing 101408, China

<sup>12</sup>Department of Astronomy, University of California, Berkeley, CA 94720-3411, USA

<sup>13</sup>Miller Senior Fellow, Miller Institute for Basic Research in Science, University of California, Berkeley, CA 94720, USA

<sup>14</sup>Astronomical Institute University of Wrocław, M. Kopernika 11, 51-622 Wrocław, Poland

<sup>15</sup>Department of Astronomy, Shanghai Jiao Tong University, Shanghai, 200240, China

<sup>16</sup>Homer L. Dodge Department of Physics and Astronomy, University of Oklahoma, Norman, OK 73019, USA

<sup>17</sup>MTA CSFK Lendület Near-Field Cosmology Research Group, Konkoly Observatory, Budapest 1121, Hungary

<sup>18</sup>ELTE Eötvös Loránd University, Department of Astronomy, Pázmány Péter sétány 1/A, Budapest 1117, Hungary

<sup>19</sup>European Southern Observatory, Karl-Schwarzschild-Strasse 2, 85748 Garching bei München, Germany

This paper has been typeset from a  $\text{\TeX}/\text{\LaTeX}$  file prepared by the author.?
